# Supplementary material for: Synthesis, characterization, and reactivity of [Pd(phosphine)(py)Cl2] (PEPPSI) and [Pd(phosphine)Cl2]2complexes
Source: Royal Society of Chemistry journal article supplement (doi:10.1039/d3dt00293d), 2023-01-01

## Supporting information

### Synthesis, characterization, and reactivity of [Pd(phosphine)(py)Cl<sub>2</sub>] (PEPPSI) and [Pd(phosphine)Cl<sub>2</sub>]<sub>2</sub> complexes.

Vladislav A. Voloshkin, Yaxu Liu, Marek Belis, Min Peng, Kristof Van Hecke, Catherine S. J. Cazin\* and Steven P. Nolan\*

Department of Chemistry and Centre for Sustainable Chemistry Ghent University Krijgslaan 281, S-3, 9000 Ghent, Belgium. Email: [Steven.Nolan@ugent.be](mailto:Steven.Nolan@ugent.be)

## Table of contents

|                                                 |    |
|-------------------------------------------------|----|
| <b>Optimization studies</b> .....               | S2 |
| <b>Crystallographic data of complexes</b> ..... | S4 |
| <b>NMR spectra of compounds</b> .....           | S9 |

## Optimization studies

**Table S1.** Catalyst and conditions screening in C-N coupling of morpholine and 4-chloroanisole.<sup>a</sup>

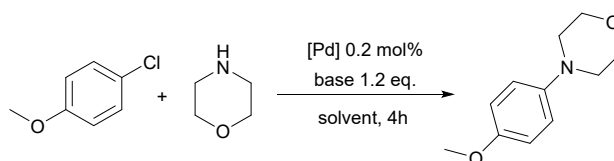

| Entry     | Catalyst  | Solvent           | Base                            | Temperature, °C | Additive <sup>b</sup> | GC yield (%) <sup>c</sup> |
|-----------|-----------|-------------------|---------------------------------|-----------------|-----------------------|---------------------------|
| 1         | 2a        | THF               | NaO <sup>t</sup> Bu             | 85              | -                     | 52                        |
| 2         | 2b        | THF               | NaO <sup>t</sup> Bu             | 85              | -                     | 74                        |
| 3         | 3a        | THF               | NaO <sup>t</sup> Bu             | 85              | -                     | 33                        |
| 4         | 3b        | THF               | NaO <sup>t</sup> Bu             | 85              | -                     | 41                        |
| 5         | 4a        | THF               | NaO <sup>t</sup> Bu             | 85              | -                     | 31                        |
| 6         | 4b        | THF               | NaO <sup>t</sup> Bu             | 85              | -                     | 30                        |
| 7         | 5a        | THF               | NaO <sup>t</sup> Bu             | 85              | -                     | 42                        |
| 8         | 5b        | THF               | NaO <sup>t</sup> Bu             | 85              | -                     | 30                        |
| 9         | 5c        | THF               | NaO <sup>t</sup> Bu             | 85              | -                     | 22                        |
| 10        | 2b        | THF               | NaO <sup>t</sup> Bu             | 85              | -                     | 97 <sup>c</sup>           |
| 11        | 2b        | THF               | KO <sup>t</sup> Bu              | 85              | -                     | 27                        |
| 12        | 2b        | Me-THF            | NaO <sup>t</sup> Bu             | 85              | -                     | 77                        |
| 13        | 2b        | Me-THF            | KO <sup>t</sup> Bu              | 85              | -                     | 54                        |
| 14        | 2b        | <sup>t</sup> BuOH | Cs <sub>2</sub> CO <sub>3</sub> | 85              | -                     | 18                        |
| <b>15</b> | <b>2b</b> | <b>Toluene</b>    | <b>NaO<sup>t</sup>Bu</b>        | <b>85</b>       | -                     | <b>97</b>                 |
| 16        | 5a        | Toluene           | NaO <sup>t</sup> Bu             | 85              | -                     | 33                        |
| 17        | 5b        | Toluene           | NaO <sup>t</sup> Bu             | 85              | -                     | 31                        |
| 18        | 5c        | Toluene           | NaO <sup>t</sup> Bu             | 85              | -                     | 22                        |
| 19        | 2b        | THF               | NaO <sup>t</sup> Bu             | 60              | -                     | 24                        |
| 20        | 5a        | THF               | NaO <sup>t</sup> Bu             | 35              | -                     | <10                       |
| 21        | 2b        | THF               | NaO <sup>t</sup> Bu             | RT              | -                     | <10                       |
| 22        | 2b        | Toluene           | NaO <sup>t</sup> Bu             | 85              | +                     | 71                        |
| 23        | 5a        | Toluene           | NaO <sup>t</sup> Bu             | 85              | +                     | 83                        |
| 24        | 5b        | Toluene           | NaO <sup>t</sup> Bu             | 85              | +                     | 50                        |
| 25        | 5c        | Toluene           | NaO <sup>t</sup> Bu             | 85              | +                     | 40                        |
| 26        | 2a        | THF               | NaO <sup>t</sup> Bu             | 85              | +                     | 83                        |
| 27        | 2b        | THF               | NaO <sup>t</sup> Bu             | 85              | +                     | 90                        |
| 28        | 3b        | THF               | NaO <sup>t</sup> Bu             | 85              | +                     | 88                        |
| 29        | 5a        | THF               | NaO <sup>t</sup> Bu             | 85              | +                     | 90                        |

|    |    |     |                     |    |   |     |
|----|----|-----|---------------------|----|---|-----|
| 30 | 5b | THF | NaO <sup>t</sup> Bu | 85 | + | 87  |
| 31 | 5c | THF | NaO <sup>t</sup> Bu | 85 | + | 49  |
| 32 | 2b | THF | NaO <sup>t</sup> Bu | RT | + | <10 |
| 33 | 5c | THF | NaO <sup>t</sup> Bu | RT | + | <10 |

<sup>a</sup> 4-chloroanisole (1 mmol), morpholine (1.2 mmol), base (1.2 mmol), catalyst (0.2 mol% Pd) and solvent (2 mL). Reaction time 4h at indicated temperature. <sup>b</sup> 3-pentanone (10 mol%) <sup>c</sup> Yield was determined using gas chromatography with dodecane as internal standard and is average of 2 runs.

## Crystallographic data of complexes

CCDC 2221473-2221475 contain the supplementary crystallographic data for this paper. These data can be obtained free of charge from The Cambridge Crystallographic Data Centre via [www.ccdc.cam.ac.uk/structures](http://www.ccdc.cam.ac.uk/structures)

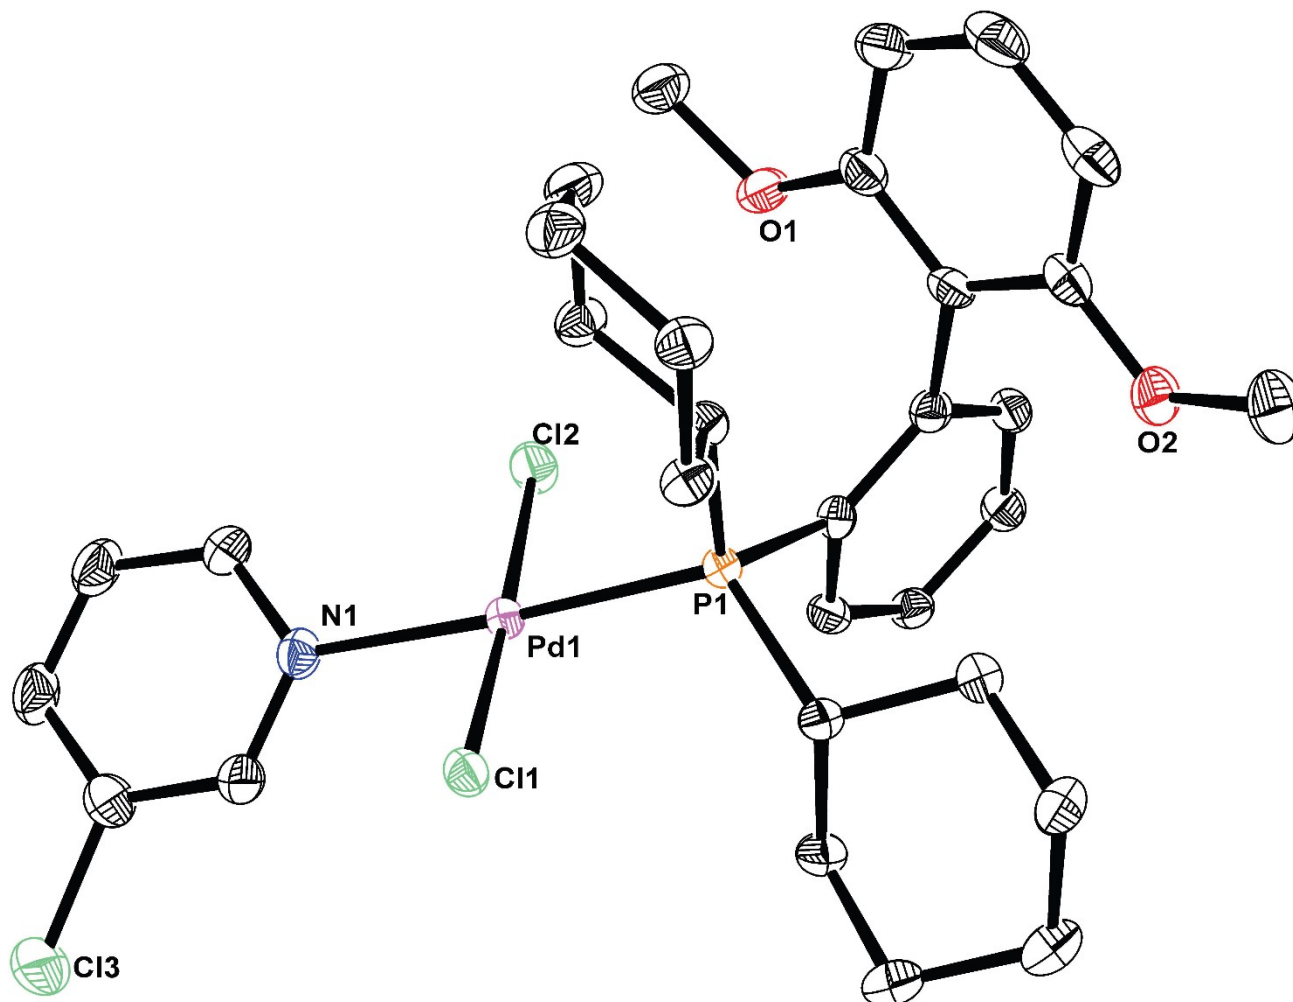

**Figure S1.** Molecular structure of the complex **3b**

**Table S2.** Crystal data and structure refinement for **3b**.

|                       |                                                                     |
|-----------------------|---------------------------------------------------------------------|
| Empirical formula     | C <sub>31</sub> H <sub>39</sub> Cl <sub>3</sub> NO <sub>2</sub> PPd |
| Formula weight        | 701.35                                                              |
| Temperature/K         | 100.0(1)                                                            |
| Crystal system        | Orthorhombic                                                        |
| Space group           | P212121                                                             |
| a/Å                   | 8.74090(10)                                                         |
| b/Å                   | 16.5403(2)                                                          |
| c/Å                   | 21.5878(3)                                                          |
| α/°                   | 90                                                                  |
| β/°                   | 90                                                                  |
| γ/°                   | 90                                                                  |
| Volume/Å <sup>3</sup> | 3121.10(7)                                                          |

|                                                |                                                               |
|------------------------------------------------|---------------------------------------------------------------|
| Z                                              | 4                                                             |
| $\rho_{\text{calc}}/\text{cm}^3$               | 1.493                                                         |
| $\mu/\text{mm}^{-1}$                           | 7.868                                                         |
| F(000)                                         | 1440.0                                                        |
| Crystal size/ $\text{mm}^3$                    | $0.188 \times 0.105 \times 0.068$                             |
| Radiation                                      | Cu K $\alpha$ ( $\lambda = 1.54184$ )                         |
| 2 $\theta$ range for data collection/ $^\circ$ | 6.732 to 147.7                                                |
| Index ranges                                   | $-10 \leq h \leq 10, -20 \leq k \leq 20, -25 \leq l \leq 26$  |
| Reflections collected                          | 27105                                                         |
| Independent reflections                        | 6239 [ $R_{\text{int}} = 0.0393, R_{\text{sigma}} = 0.0306$ ] |
| Data/restraints/parameters                     | 6239/0/354                                                    |
| Goodness-of-fit on $F^2$                       | 1.036                                                         |
| Final R indexes [ $I \geq 2\sigma(I)$ ]        | $R_1 = 0.0230, wR_2 = 0.0526$                                 |
| Final R indexes [all data]                     | $R_1 = 0.0260, wR_2 = 0.0540$                                 |
| Largest diff. peak/hole / $e \text{ \AA}^{-3}$ | 0.32/-0.41                                                    |

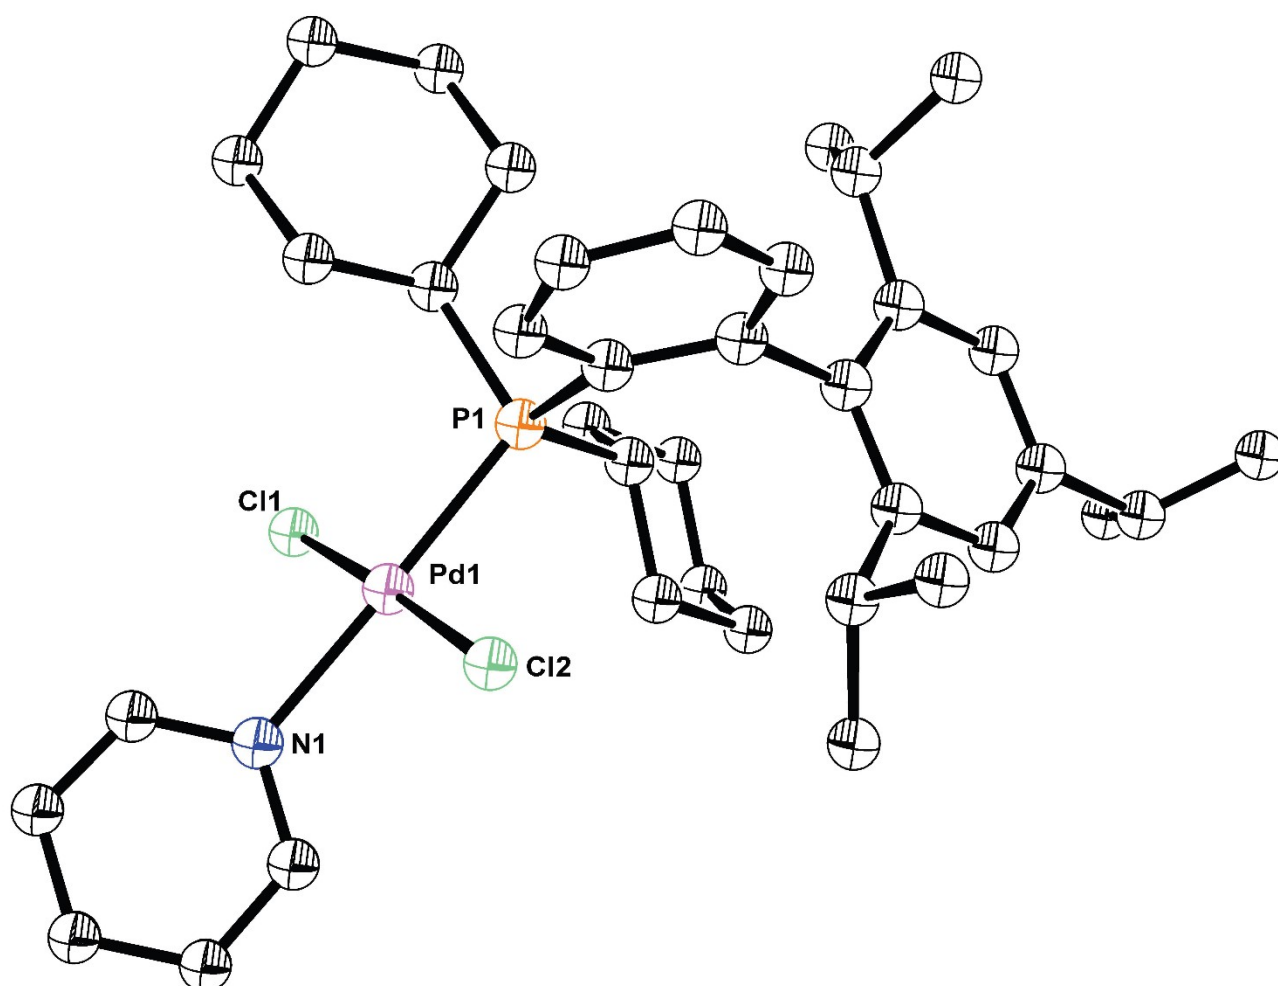

**Figure S2.** Molecular structure of the complex **4a**

**Table S3.** Crystal data and structure refinement for **4a**.

|                                             |                                                               |
|---------------------------------------------|---------------------------------------------------------------|
| Empirical formula                           | C <sub>39</sub> H <sub>55</sub> Cl <sub>5</sub> NPPd          |
| Formula weight                              | 852.46                                                        |
| Temperature/K                               | 100.0(1)                                                      |
| Crystal system                              | triclinic                                                     |
| Space group                                 | P-1                                                           |
| a/Å                                         | 9.5074(2)                                                     |
| b/Å                                         | 10.9513(2)                                                    |
| c/Å                                         | 21.0209(5)                                                    |
| α/°                                         | 89.4832(17)                                                   |
| β/°                                         | 79.552(2)                                                     |
| γ/°                                         | 74.1193(19)                                                   |
| Volume/Å <sup>3</sup>                       | 2068.32(8)                                                    |
| Z                                           | 2                                                             |
| ρ <sub>calc</sub> g/cm <sup>3</sup>         | 1.369                                                         |
| μ/mm <sup>-1</sup>                          | 7.155                                                         |
| F(000)                                      | 884.0                                                         |
| Crystal size/mm <sup>3</sup>                | 0.171 × 0.082 × 0.065                                         |
| Radiation                                   | Cu Kα (λ = 1.54184)                                           |
| 2θ range for data collection/°              | 8.402 to 147.782                                              |
| Index ranges                                | -11 ≤ h ≤ 11, -13 ≤ k ≤ 13, -26 ≤ l ≤ 26                      |
| Reflections collected                       | 38851                                                         |
| Independent reflections                     | 8258 [R <sub>int</sub> = 0.0591, R <sub>sigma</sub> = 0.0408] |
| Data/restraints/parameters                  | 8258/11/443                                                   |
| Goodness-of-fit on F <sup>2</sup>           | 1.028                                                         |
| Final R indexes [I ≥ 2σ (I)]                | R <sub>1</sub> = 0.0459, wR <sub>2</sub> = 0.1186             |
| Final R indexes [all data]                  | R <sub>1</sub> = 0.0520, wR <sub>2</sub> = 0.1241             |
| Largest diff. peak/hole / e Å <sup>-3</sup> | 1.62/-1.24                                                    |

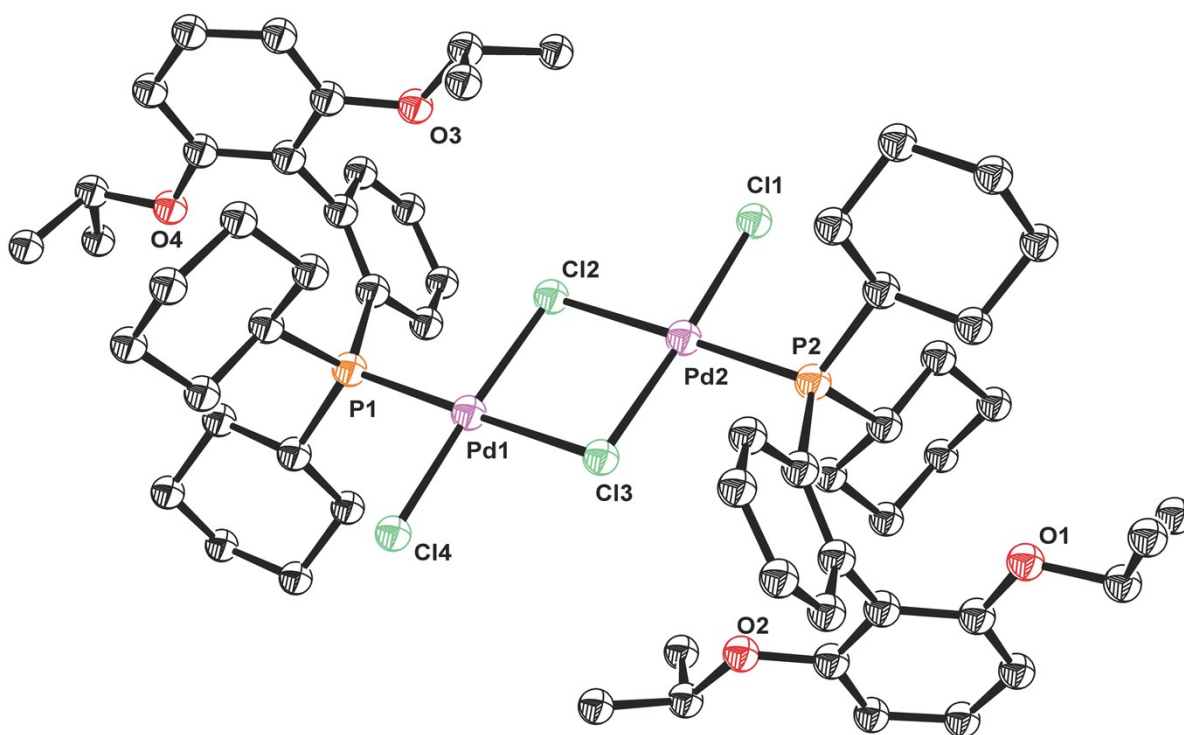

**Figure S3.** Molecular structure of the complex **5a**

**Table S4.** Crystal data and structure refinement for **5a**.

|                                    |                                                                                               |
|------------------------------------|-----------------------------------------------------------------------------------------------|
| Empirical formula                  | C <sub>60</sub> H <sub>86</sub> Cl <sub>4</sub> O <sub>4</sub> P <sub>2</sub> Pd <sub>2</sub> |
| Formula weight                     | 1287.83                                                                                       |
| Temperature/K                      | 100.0(1)                                                                                      |
| Crystal system                     | monoclinic                                                                                    |
| Space group                        | P21/n                                                                                         |
| a/Å                                | 9.8194(3)                                                                                     |
| b/Å                                | 16.4376(4)                                                                                    |
| c/Å                                | 18.6502(5)                                                                                    |
| α/°                                | 90                                                                                            |
| β/°                                | 95.314(2)                                                                                     |
| γ/°                                | 90                                                                                            |
| Volume/Å <sup>3</sup>              | 2997.34(14)                                                                                   |
| Z                                  | 2                                                                                             |
| ρ <sub>calc</sub> /cm <sup>3</sup> | 1.427                                                                                         |
| μ/mm <sup>-1</sup>                 | 7.326                                                                                         |
| F(000)                             | 1336.0                                                                                        |
| Crystal size/mm <sup>3</sup>       | 0.16 × 0.065 × 0.029                                                                          |
| Radiation                          | Cu Kα (λ = 1.54184)                                                                           |
| 2θ range for data collection/°     | 7.182 to 147.962                                                                              |
| Index ranges                       | -11 ≤ h ≤ 12, -20 ≤ k ≤ 20, -23 ≤ l ≤ 20                                                      |

Reflections collected 28583  
Independent reflections 6074 [ $R_{\text{int}} = 0.0893$ ,  $R_{\text{sigma}} = 0.0653$ ]  
Data/restraints/parameters 6074/0/338  
Goodness-of-fit on  $F^2$  1.005  
Final R indexes [ $I \geq 2\sigma(I)$ ]  $R_1 = 0.0419$ ,  $wR_2 = 0.0957$   
Final R indexes [all data]  $R_1 = 0.0649$ ,  $wR_2 = 0.1086$   
Largest diff. peak/hole /  $e \text{ \AA}^{-3}$  0.69/-0.89



# NMR spectra of compounds

<sup>1</sup>H NMR of 2a in CDCl<sub>3</sub>

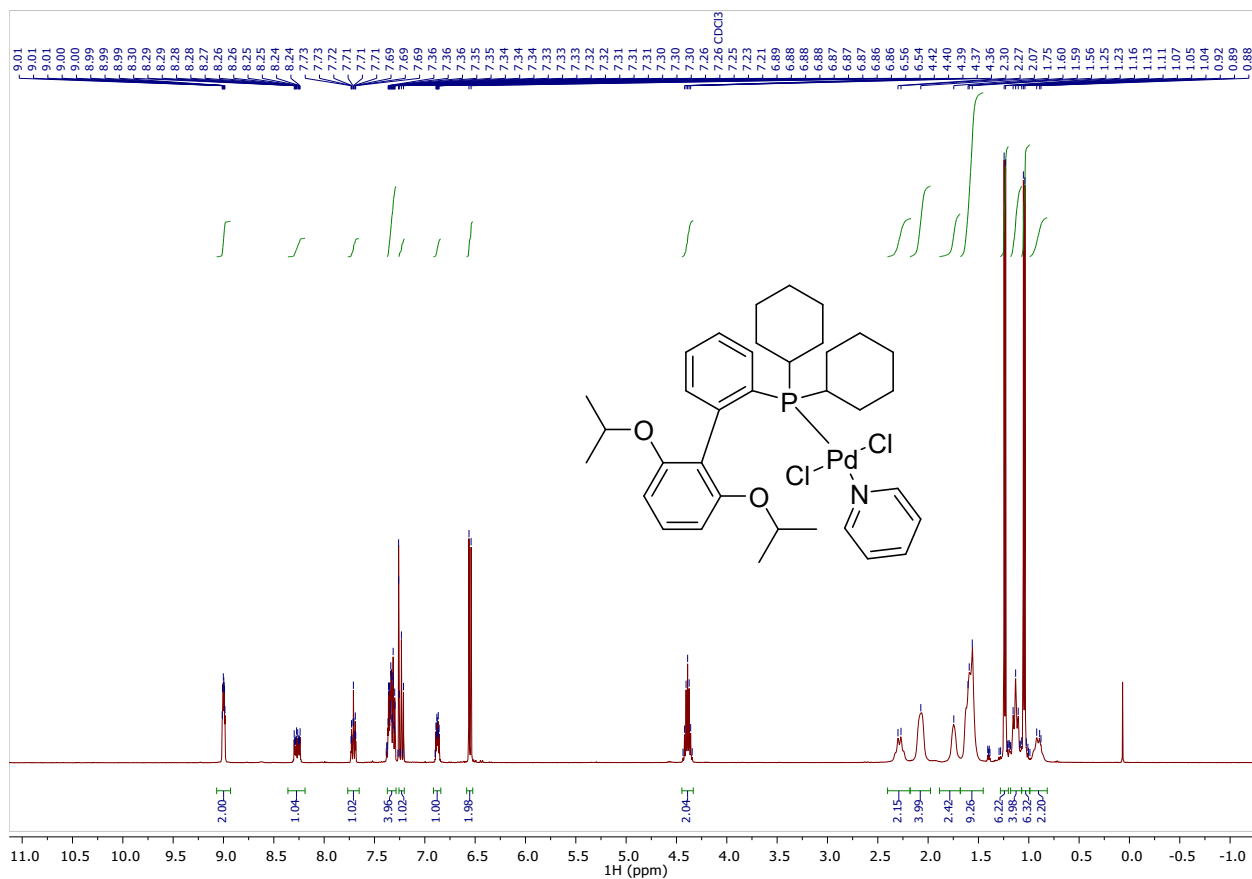

<sup>13</sup>C DEPT NMR of **2a** in CDCl<sub>3</sub>

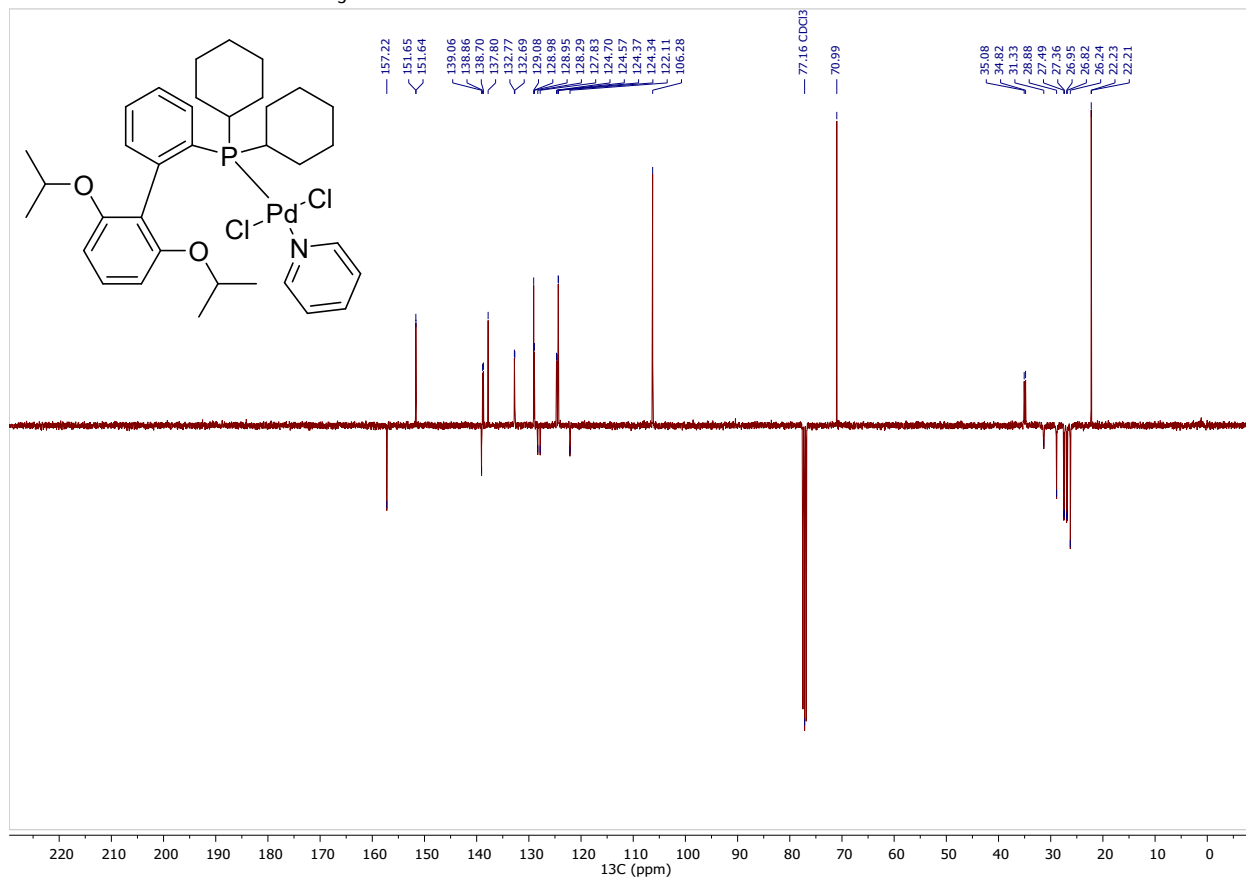

<sup>31</sup>P NMR of **2a** in CDCl<sub>3</sub>

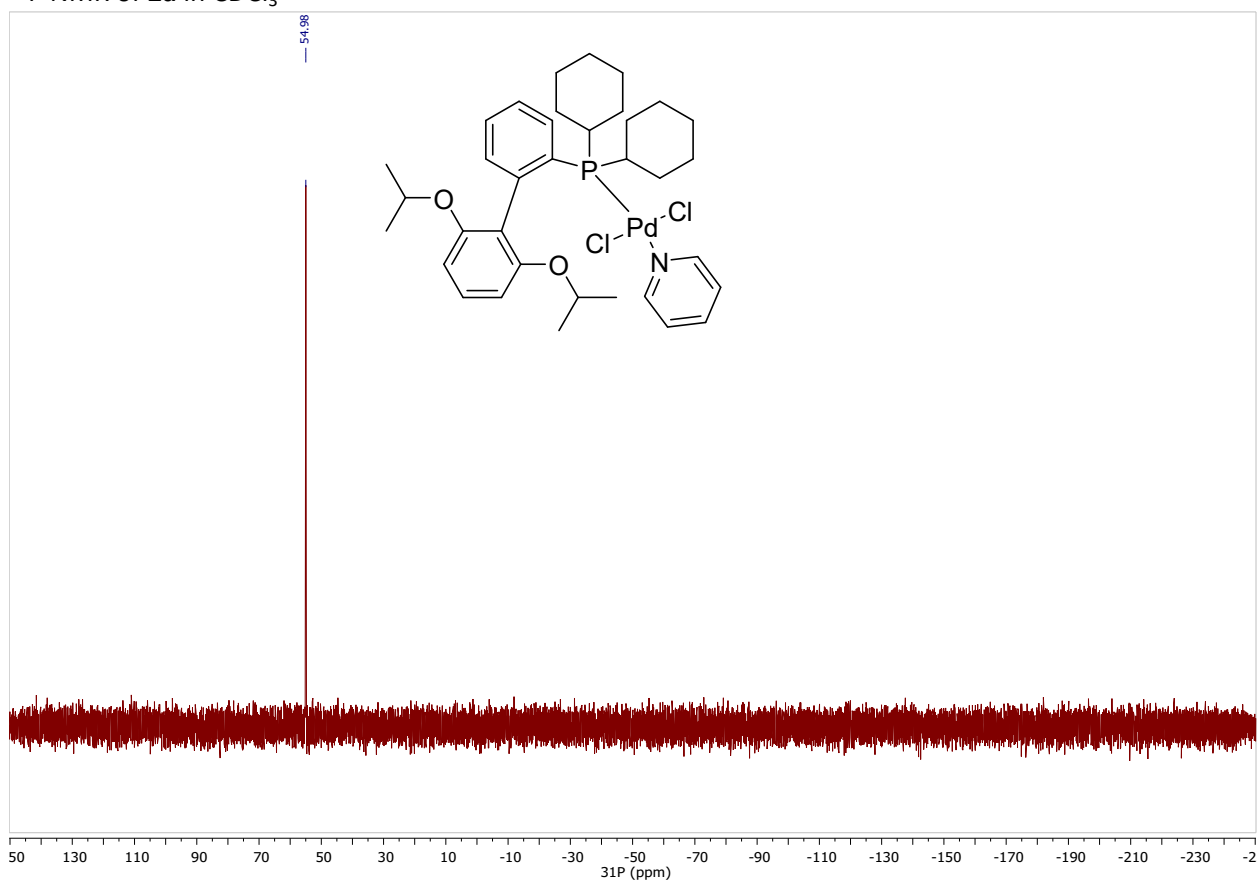

<sup>1</sup>H NMR of **3a** in CDCl<sub>3</sub>

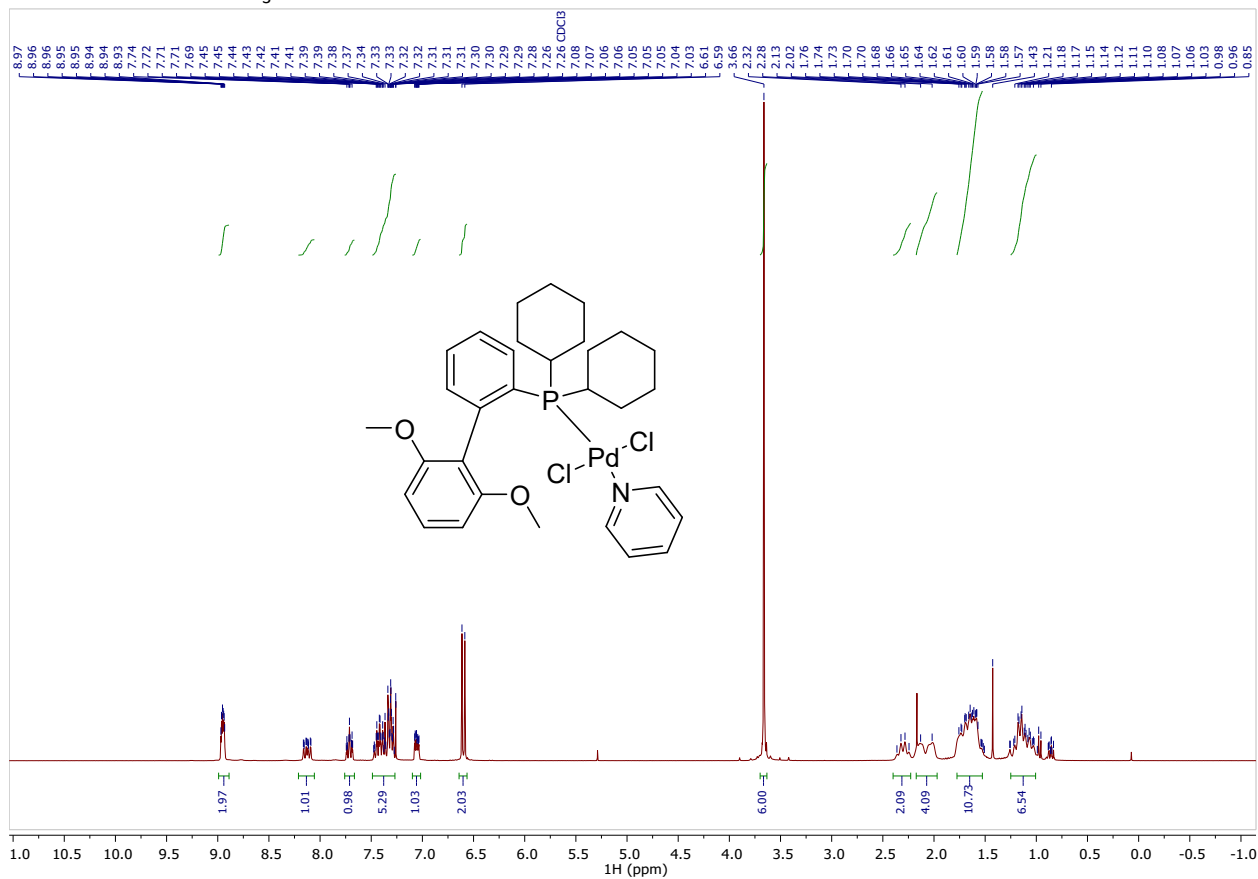

<sup>13</sup>C DEPT NMR of **3a** in CDCl<sub>3</sub>

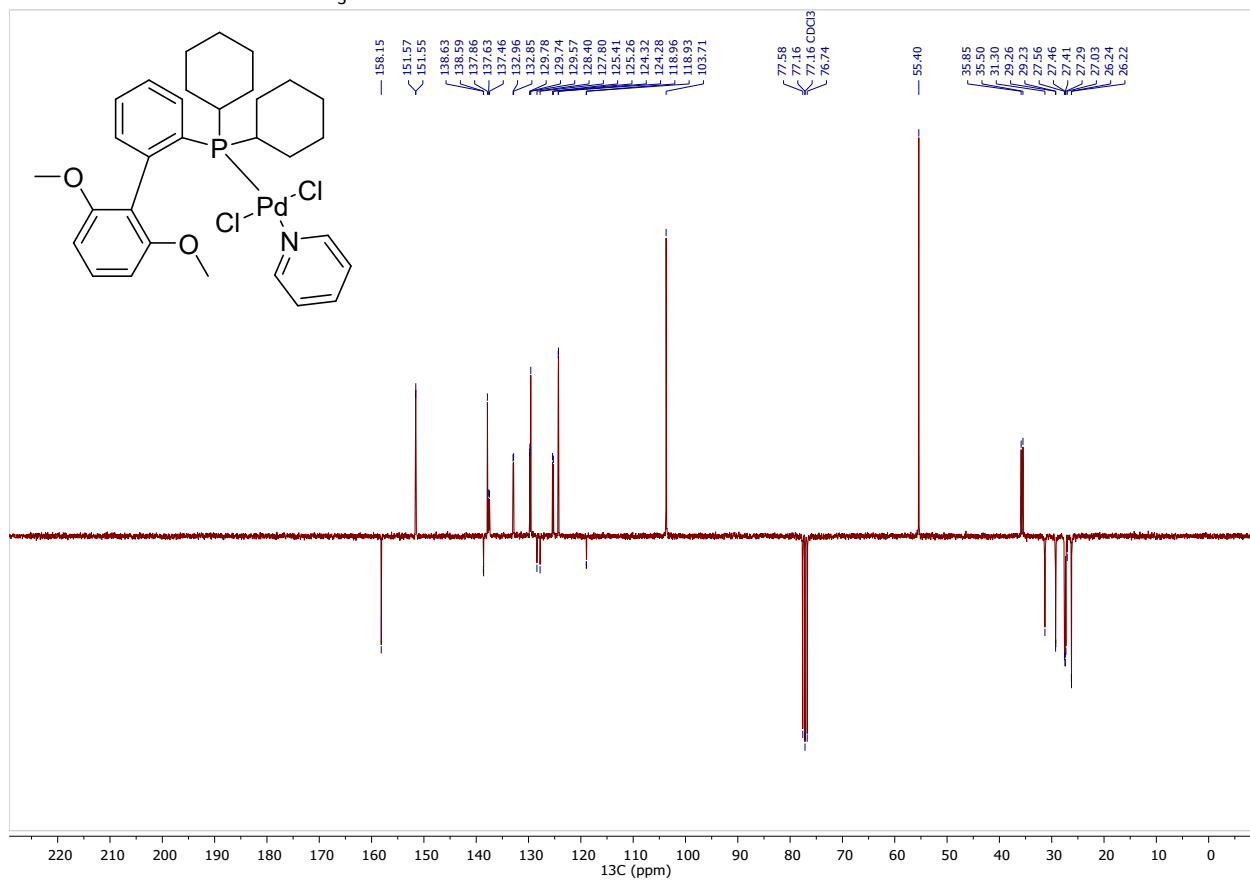

$^{31}\text{P}$  NMR of **3a** in  $\text{CDCl}_3$

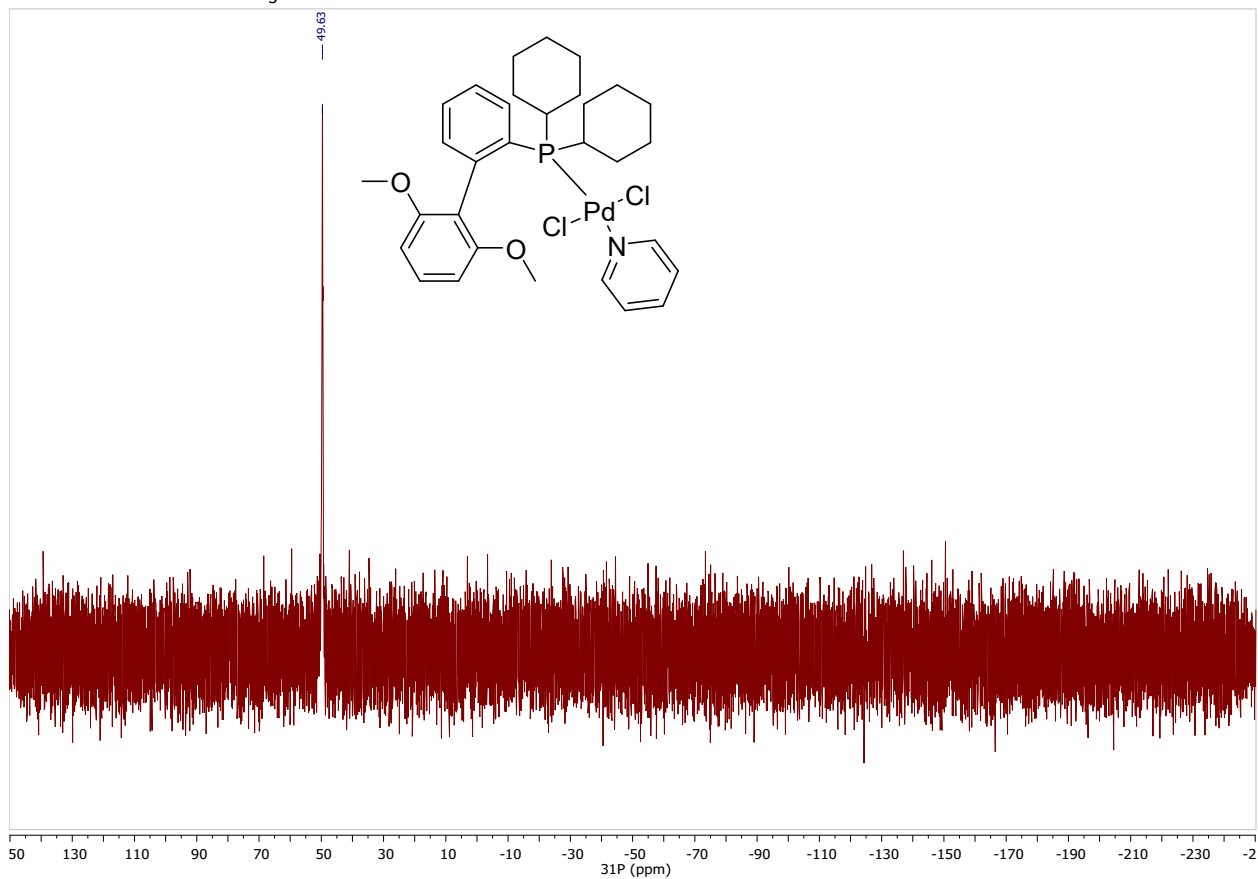

$^1\text{H}$  NMR of **4a** in  $\text{CDCl}_3$

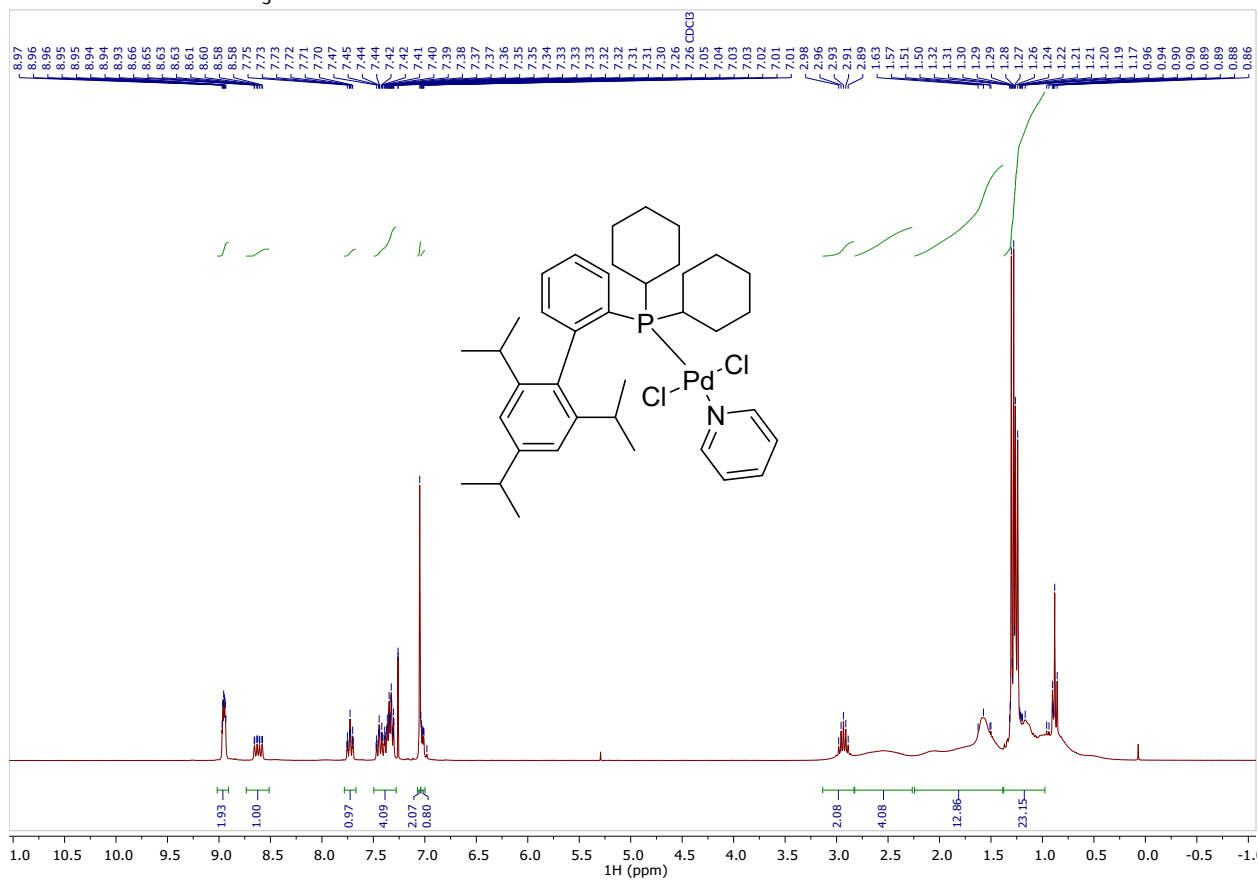

$^{31}\text{P}$  NMR of **4a** in  $\text{CDCl}_3$

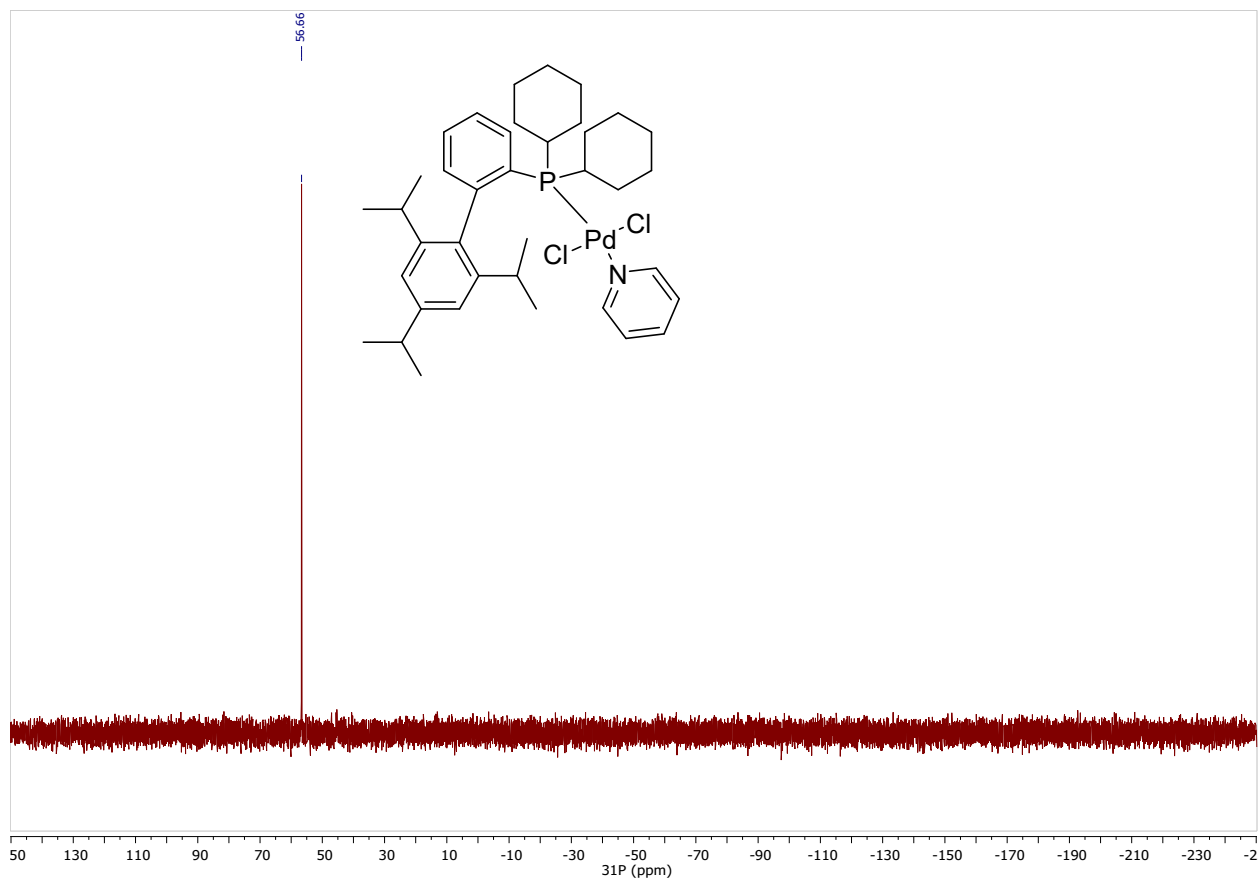

$^{13}\text{C}$  DEPT NMR of **4a** in  $\text{CDCl}_3$

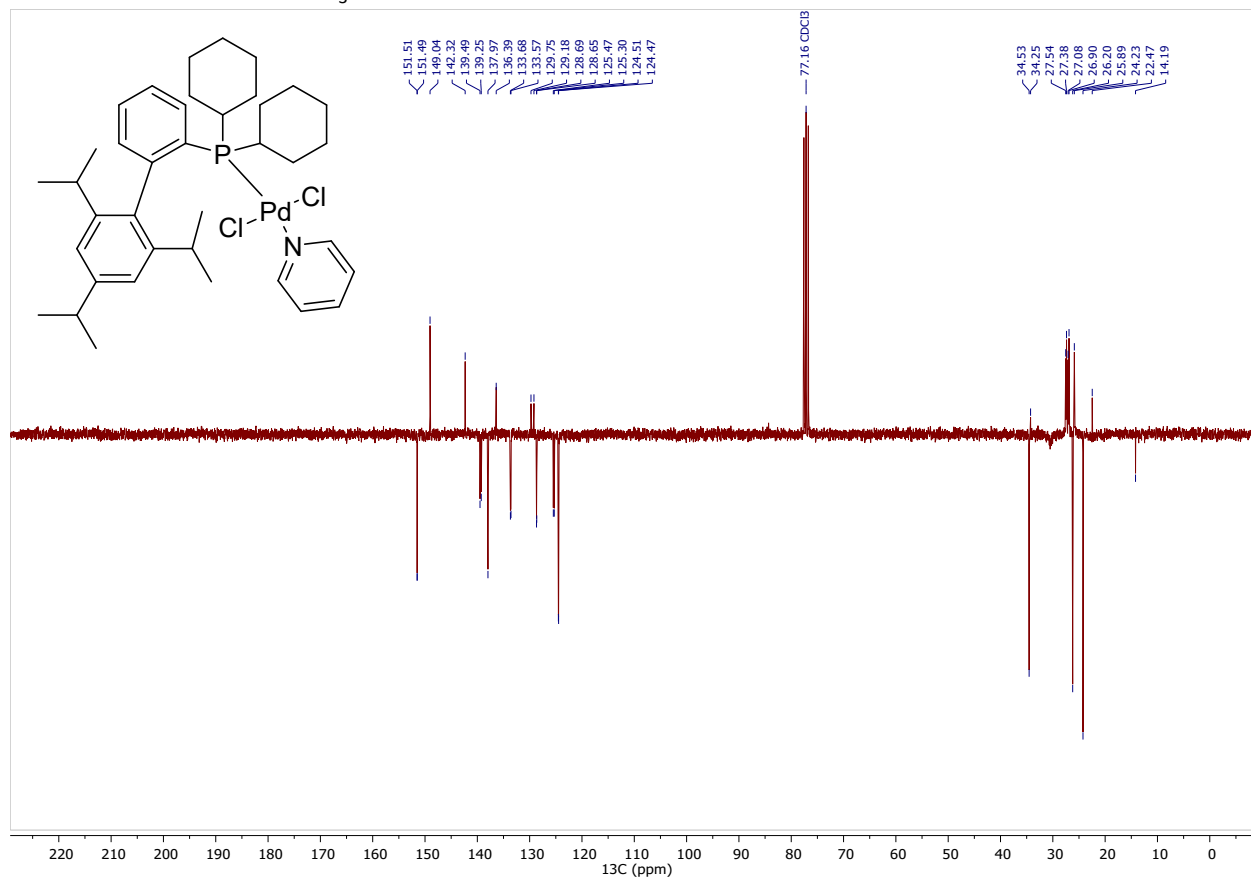

<sup>1</sup>H NMR of **4b** in CDCl<sub>3</sub>

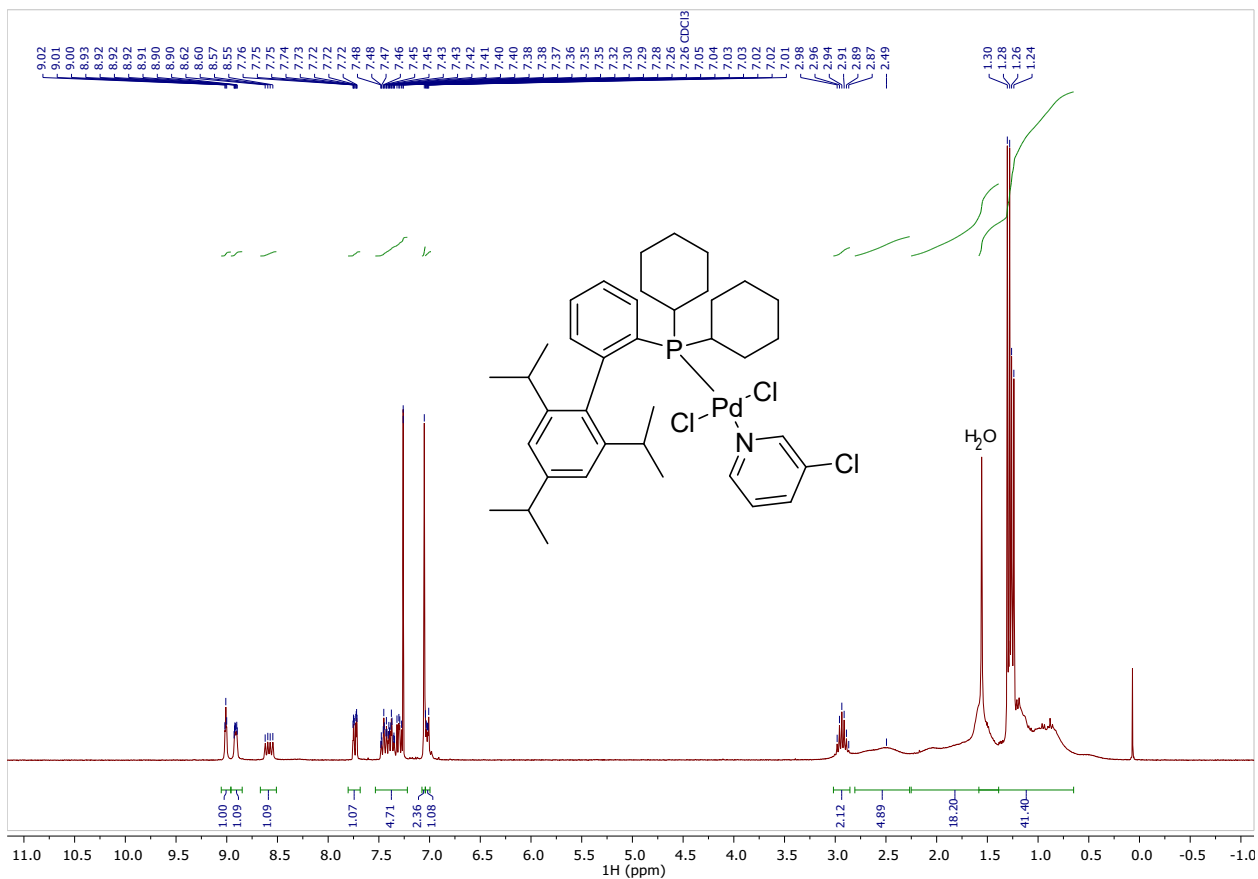

<sup>13</sup>C DEPT NMR of **4b** in CDCl<sub>3</sub>

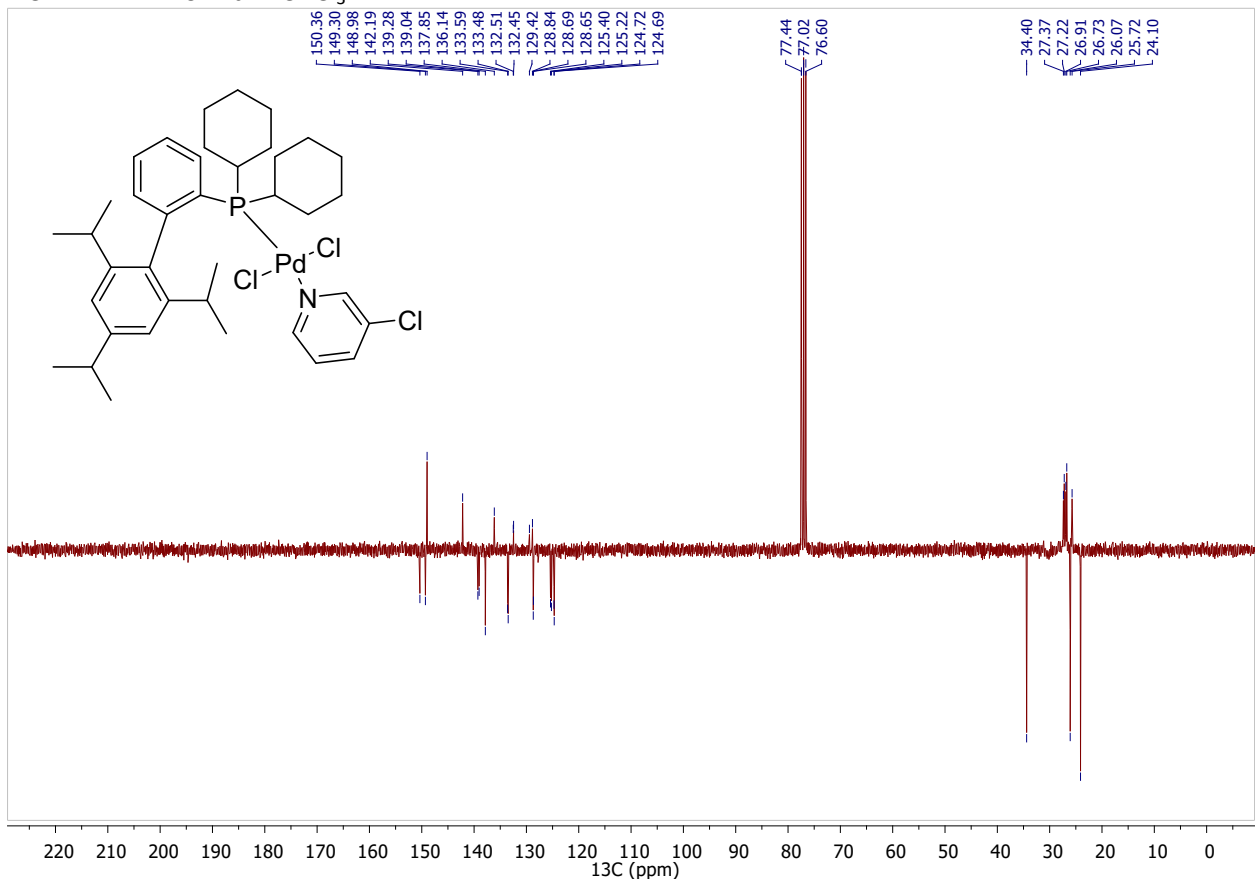



$^{13}\text{C}$  DEPT NMR of **3b** in  $\text{CDCl}_3$

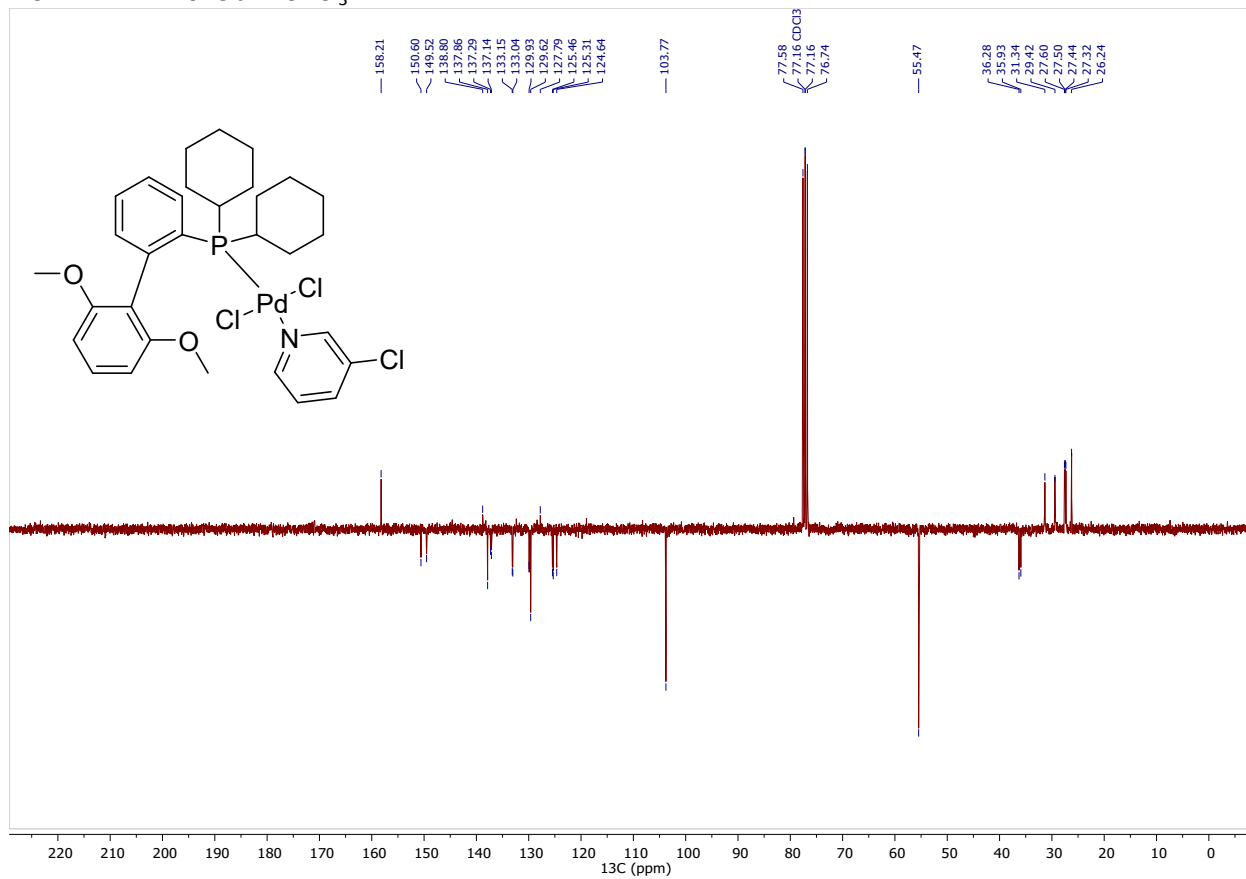

$^{31}\text{P}$  NMR of **3b** in  $\text{CDCl}_3$

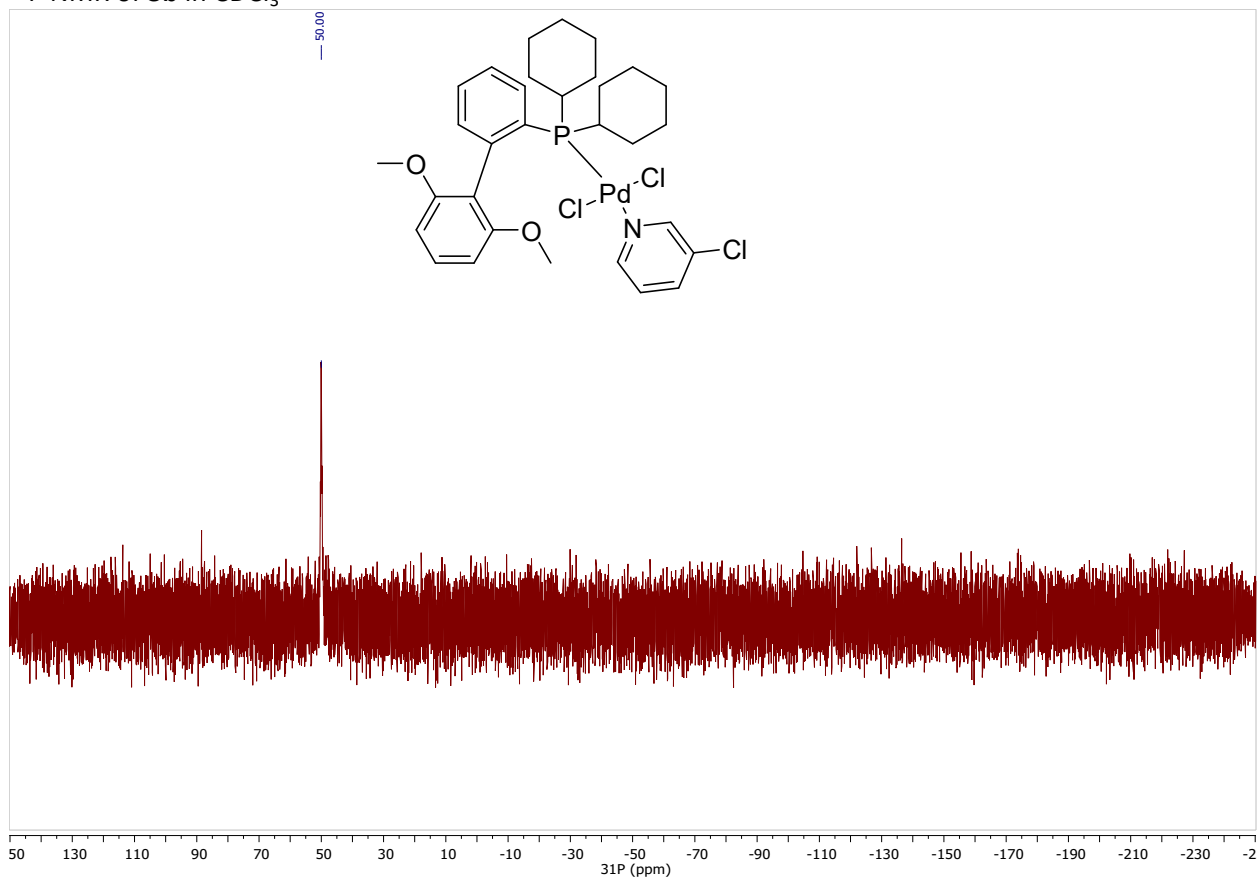



<sup>1</sup>H NMR of **2b** in CDCl<sub>3</sub>

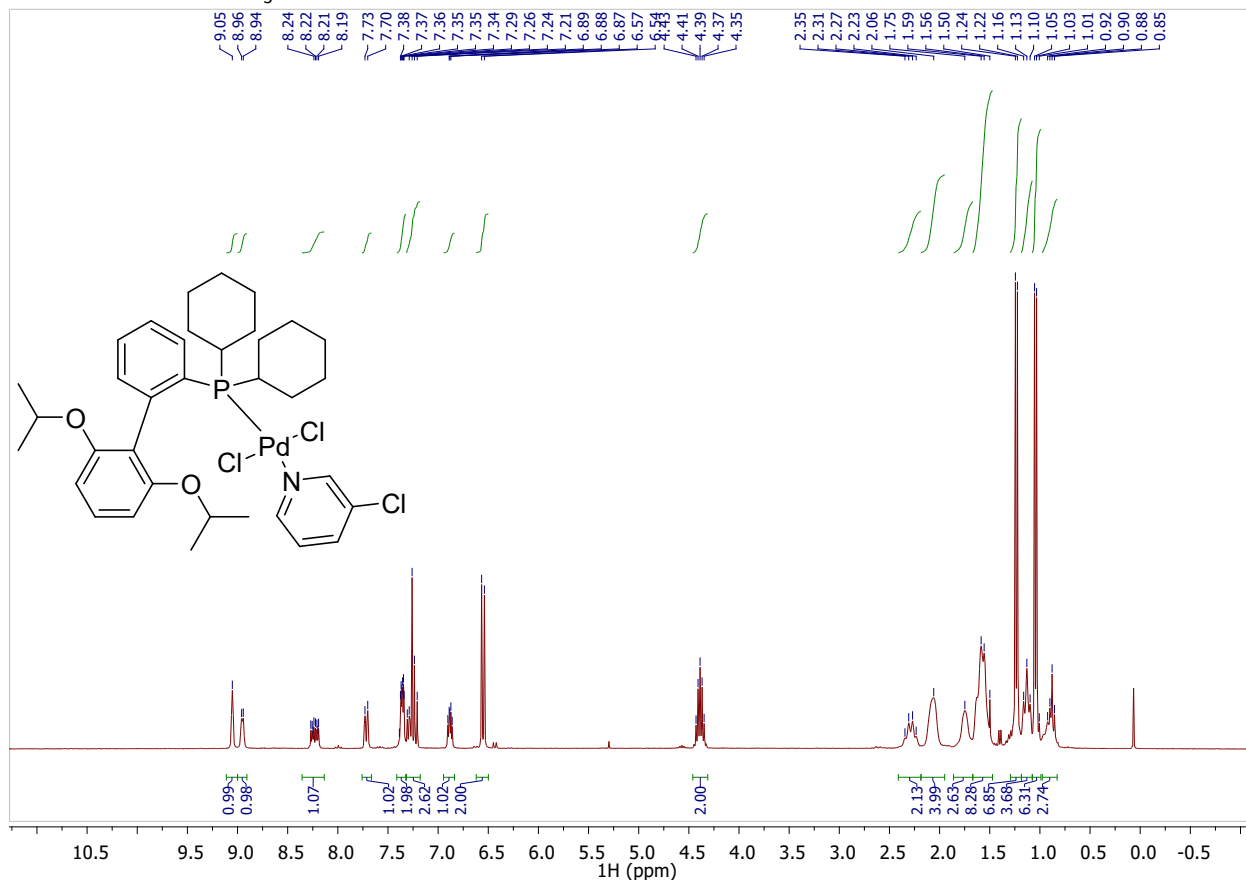

<sup>13</sup>C DEPT NMR of **2b** in CDCl<sub>3</sub>

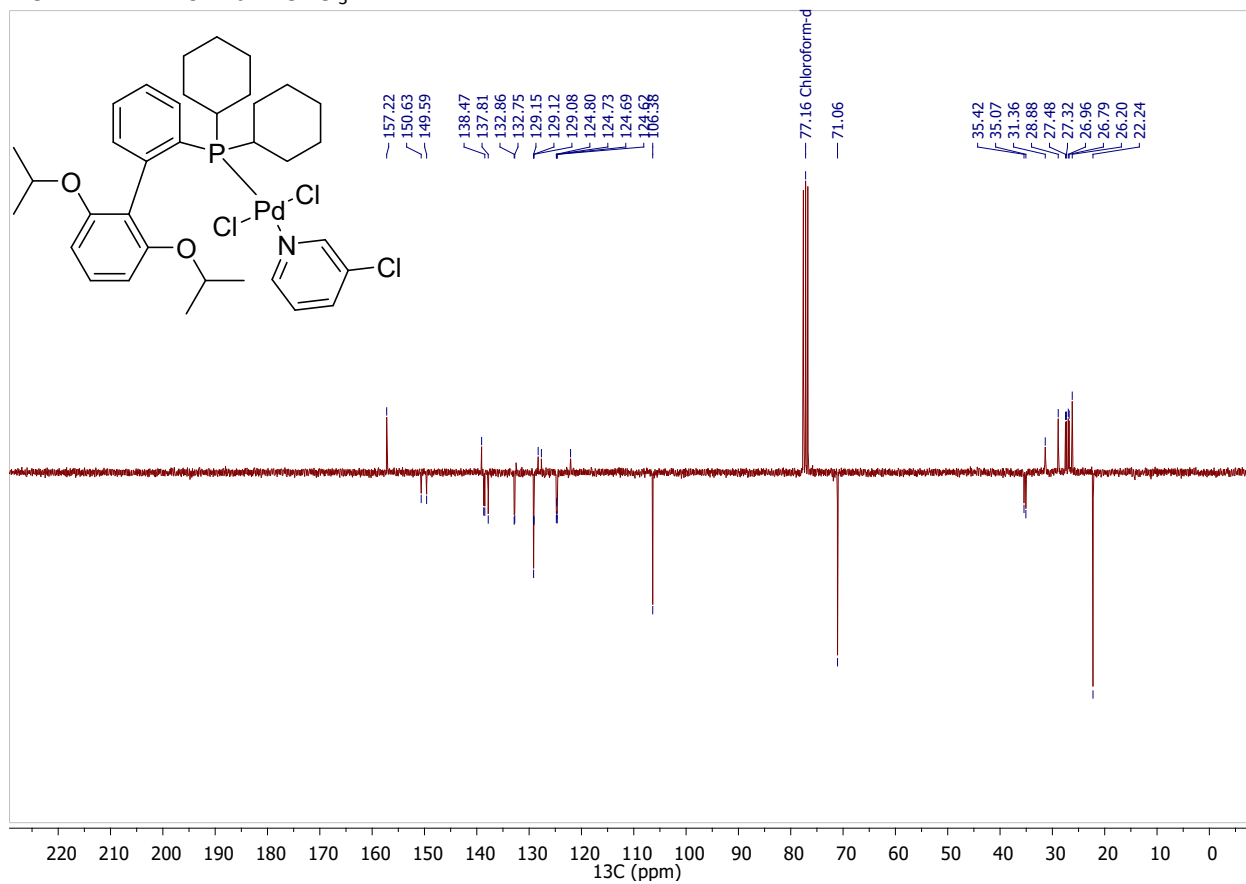

$^{31}\text{P}$  NMR of **2b** in  $\text{CDCl}_3$

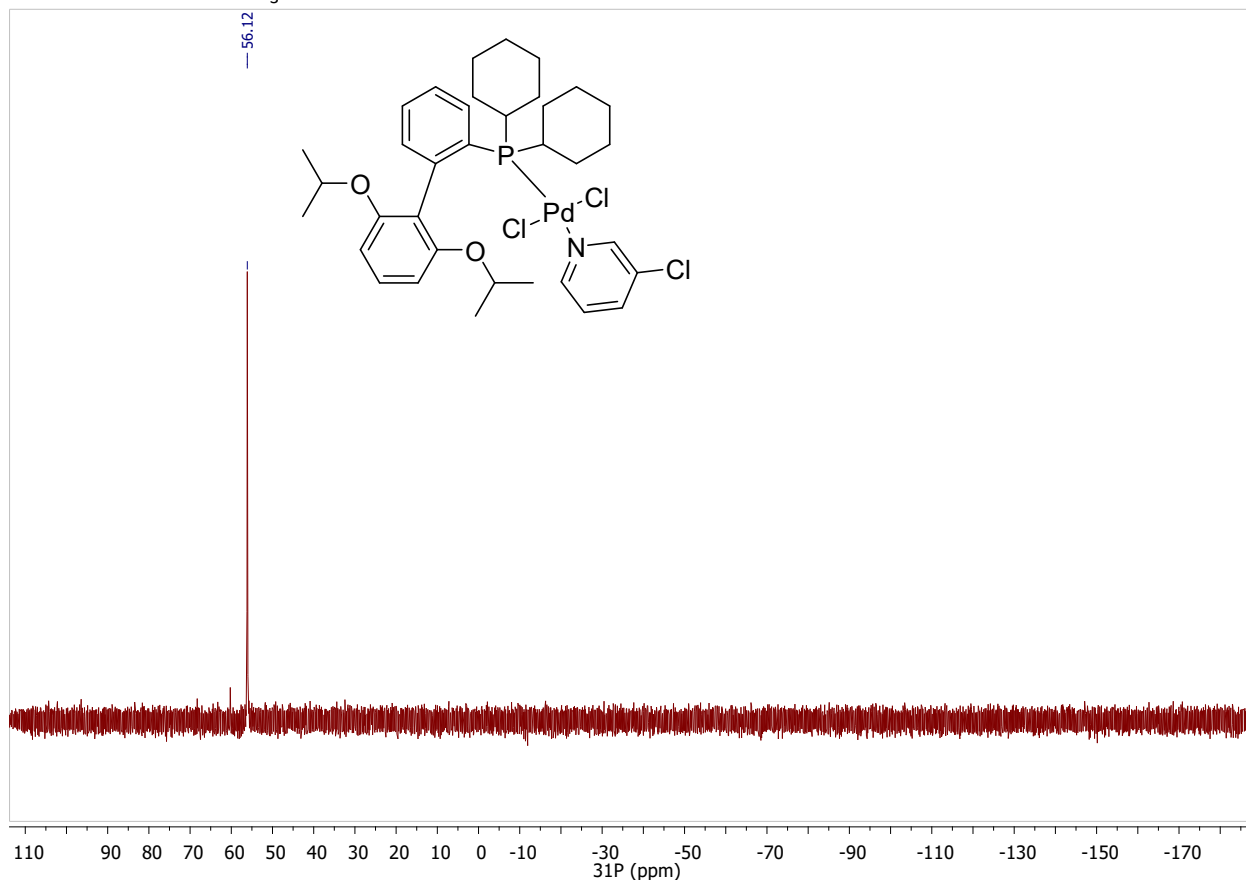

$^1\text{H}$  NMR of **5a** in  $\text{DMSO-d}_6$

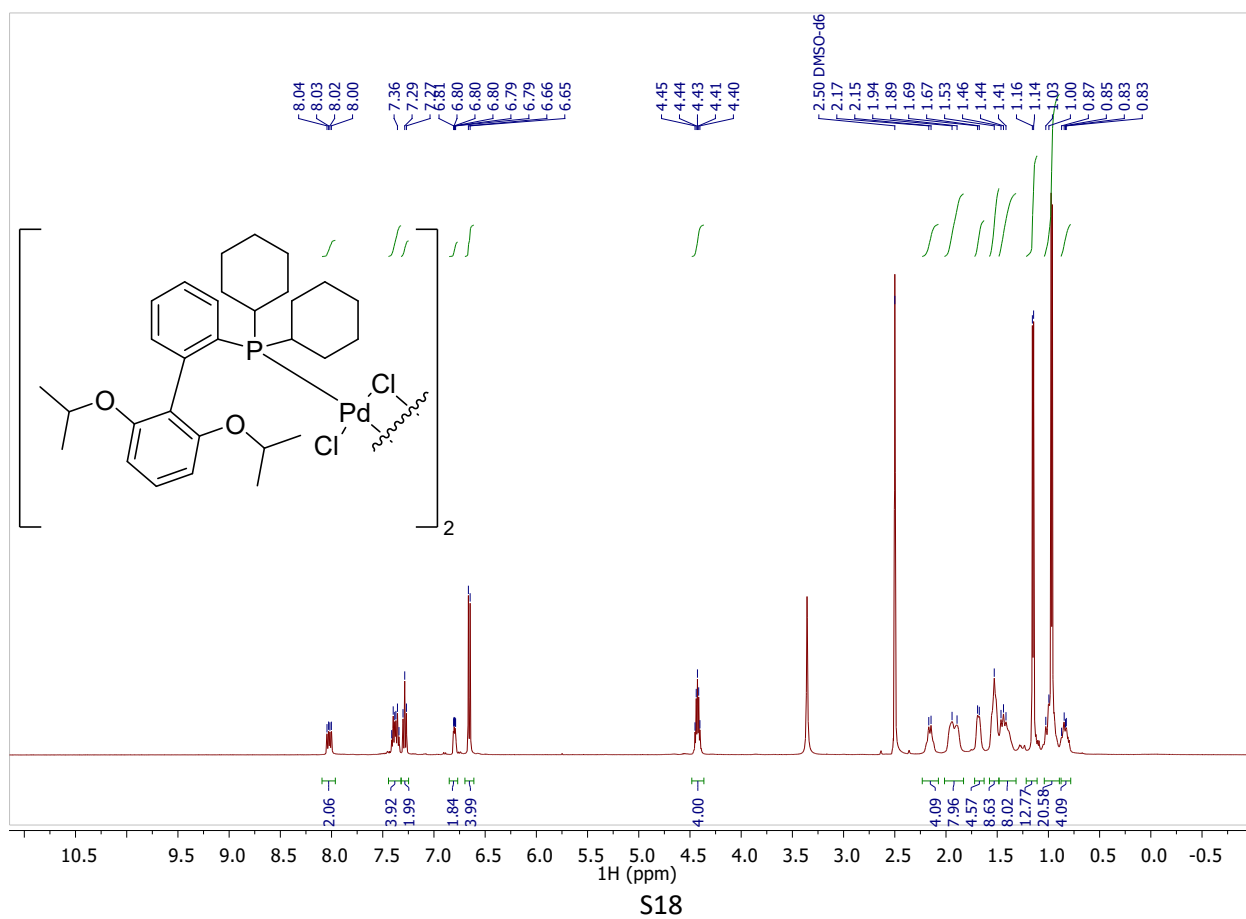

$^{31}\text{P}$  NMR of **5a** in  $\text{CDCl}_3$

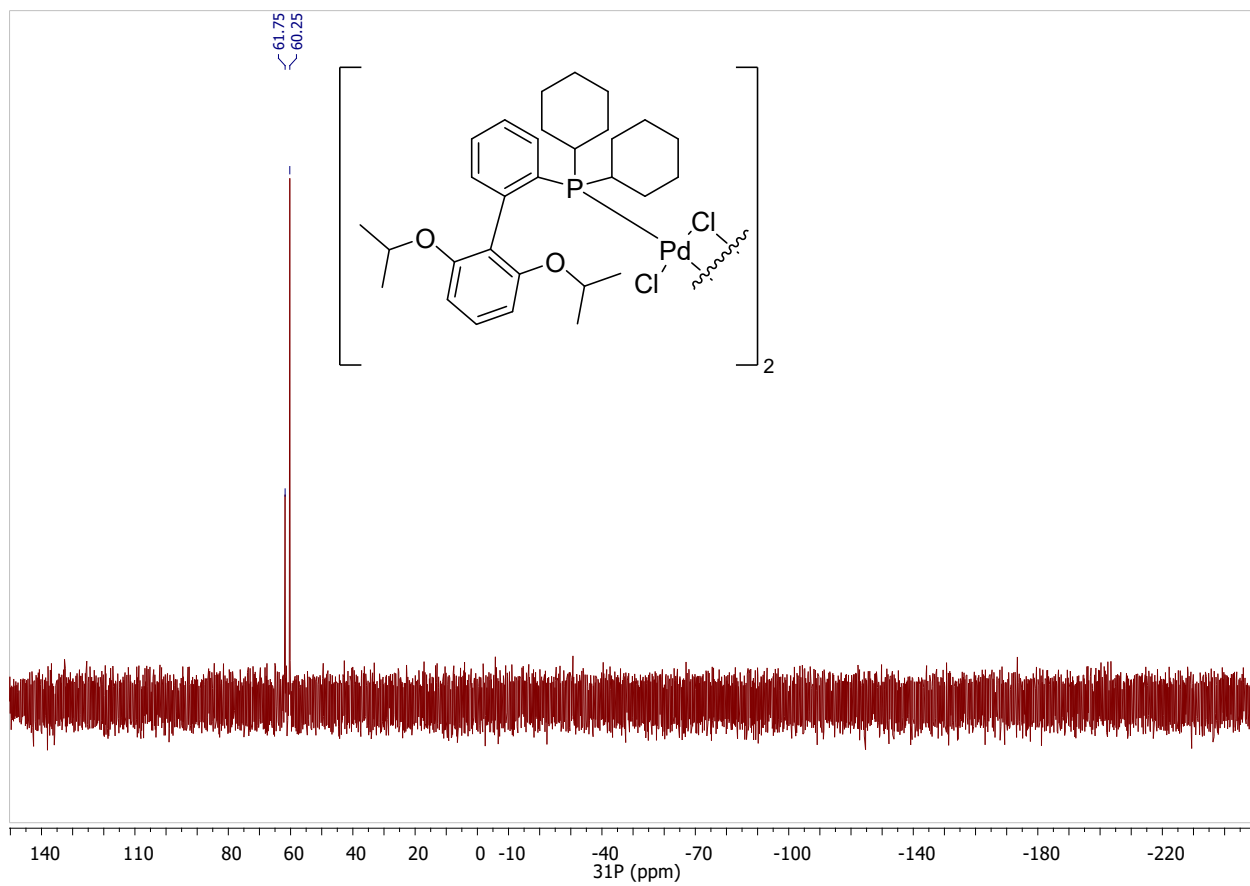

$^{31}\text{P}$  NMR of **5a** in  $\text{DMSO-d}_6$

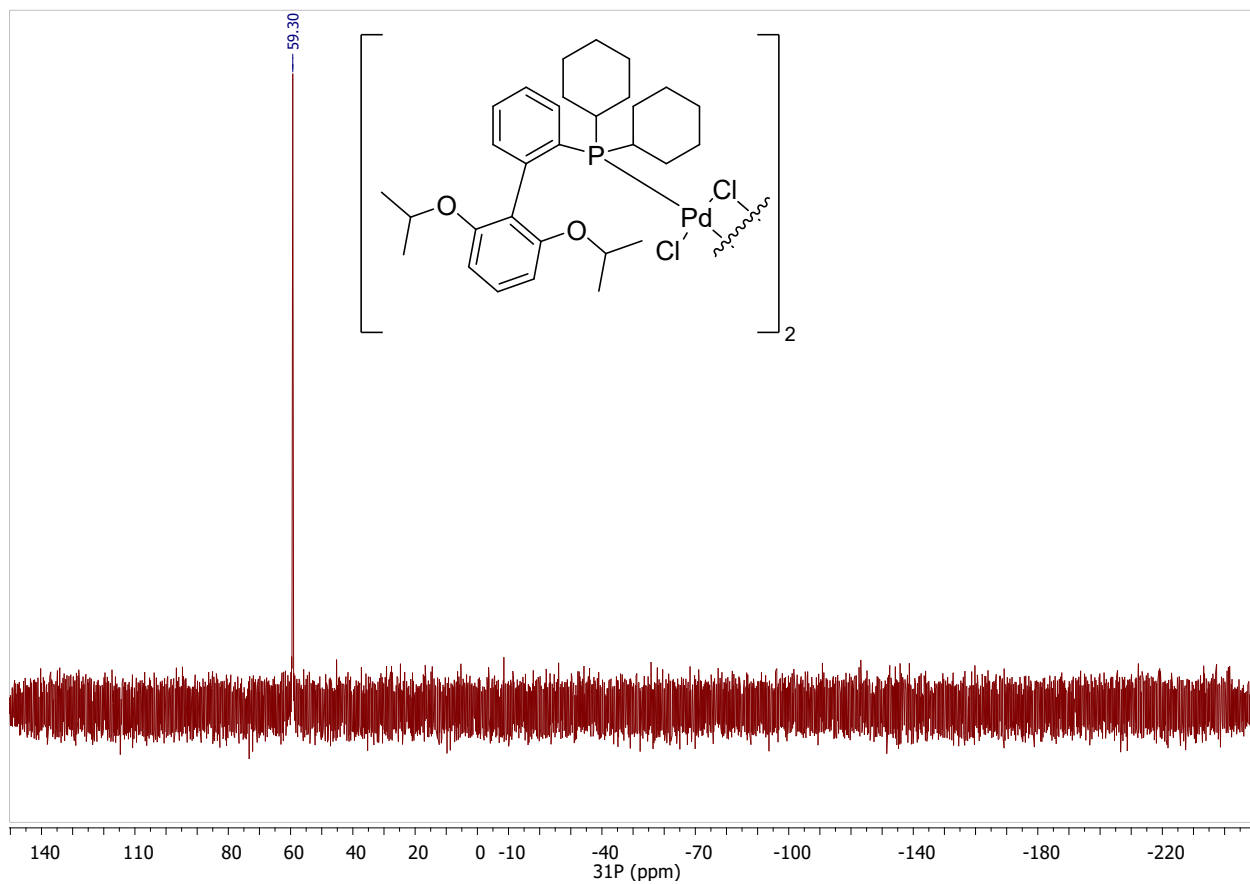

$^{13}\text{C}$  NMR of **5a** in  $\text{DMSO-d}_6$

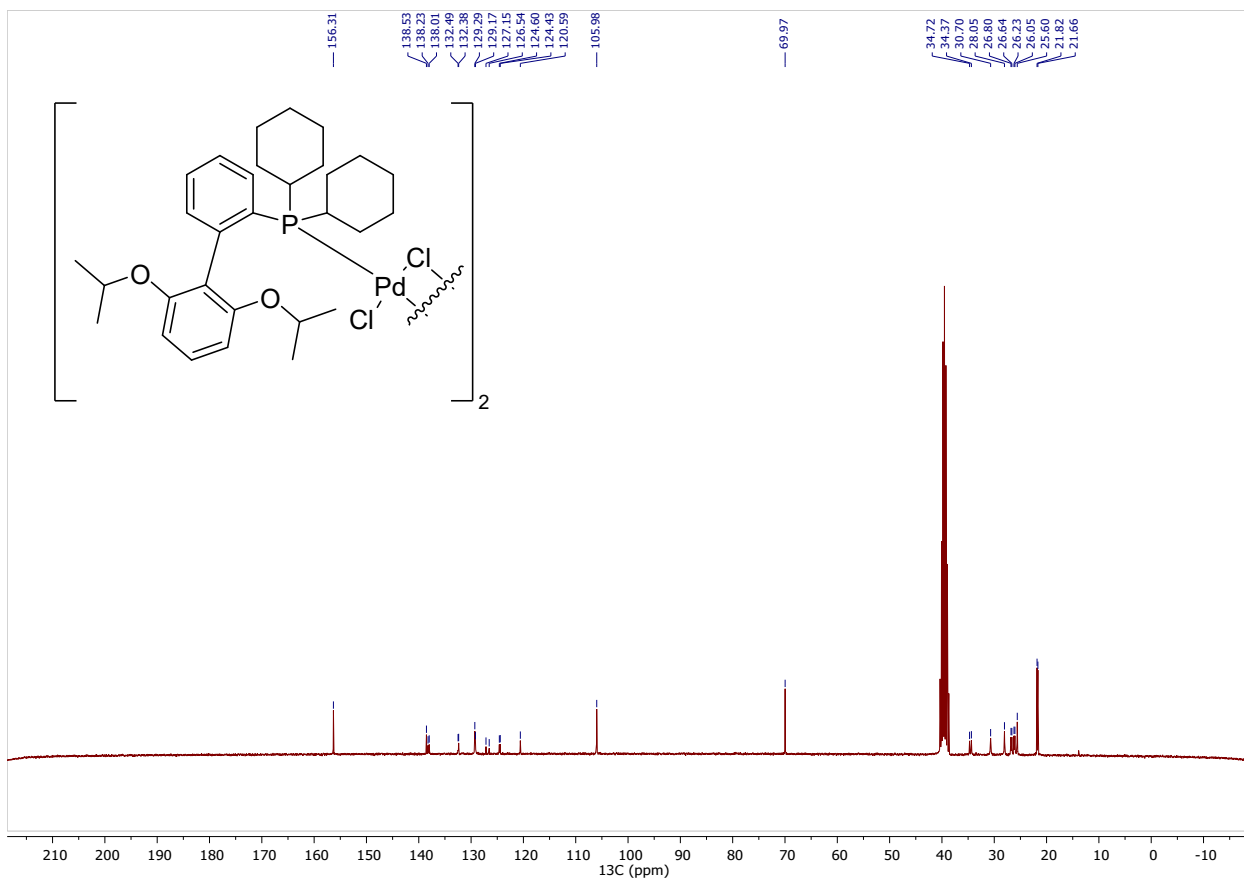

$^1\text{H}$  NMR of **5b** in  $\text{CDCl}_3$

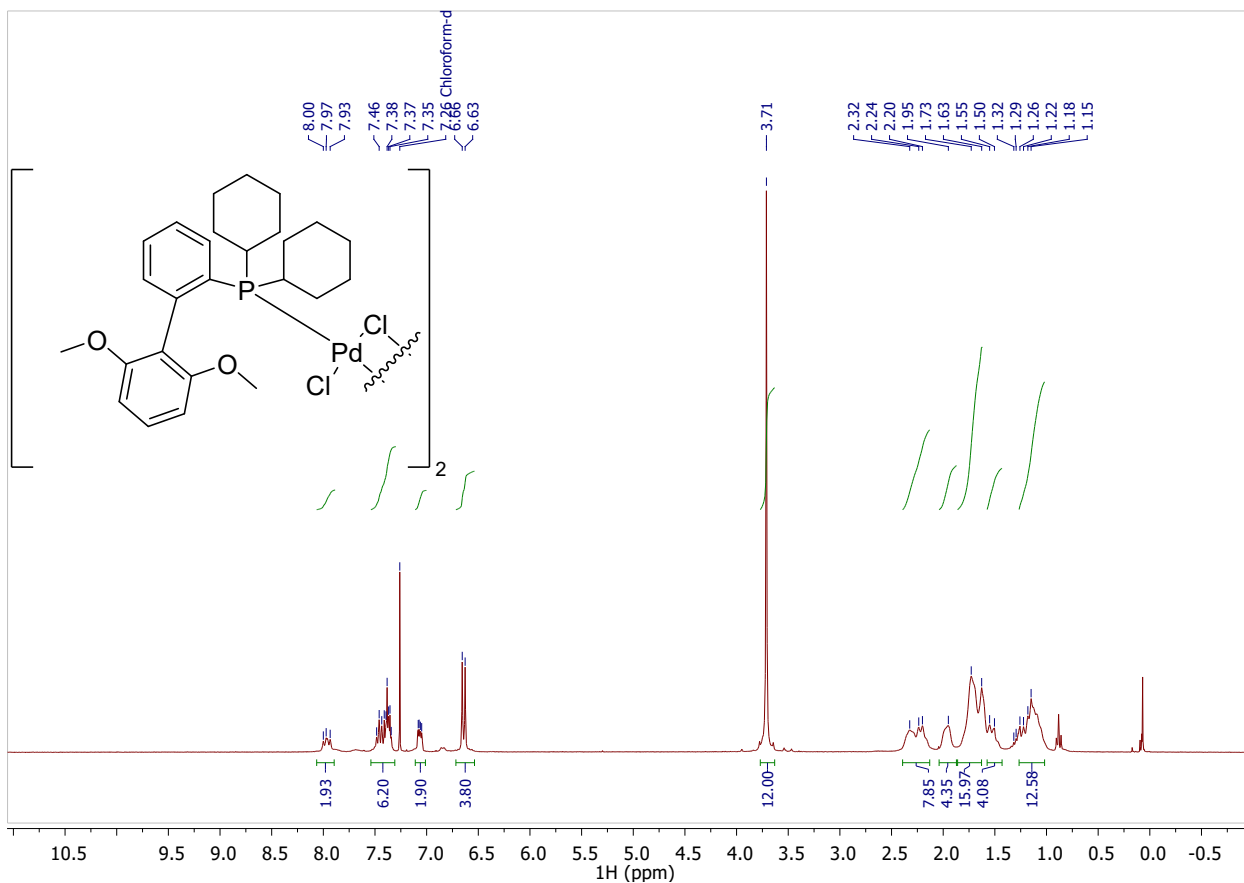

$^{31}\text{P}$  NMR of **5b** in  $\text{CDCl}_3$

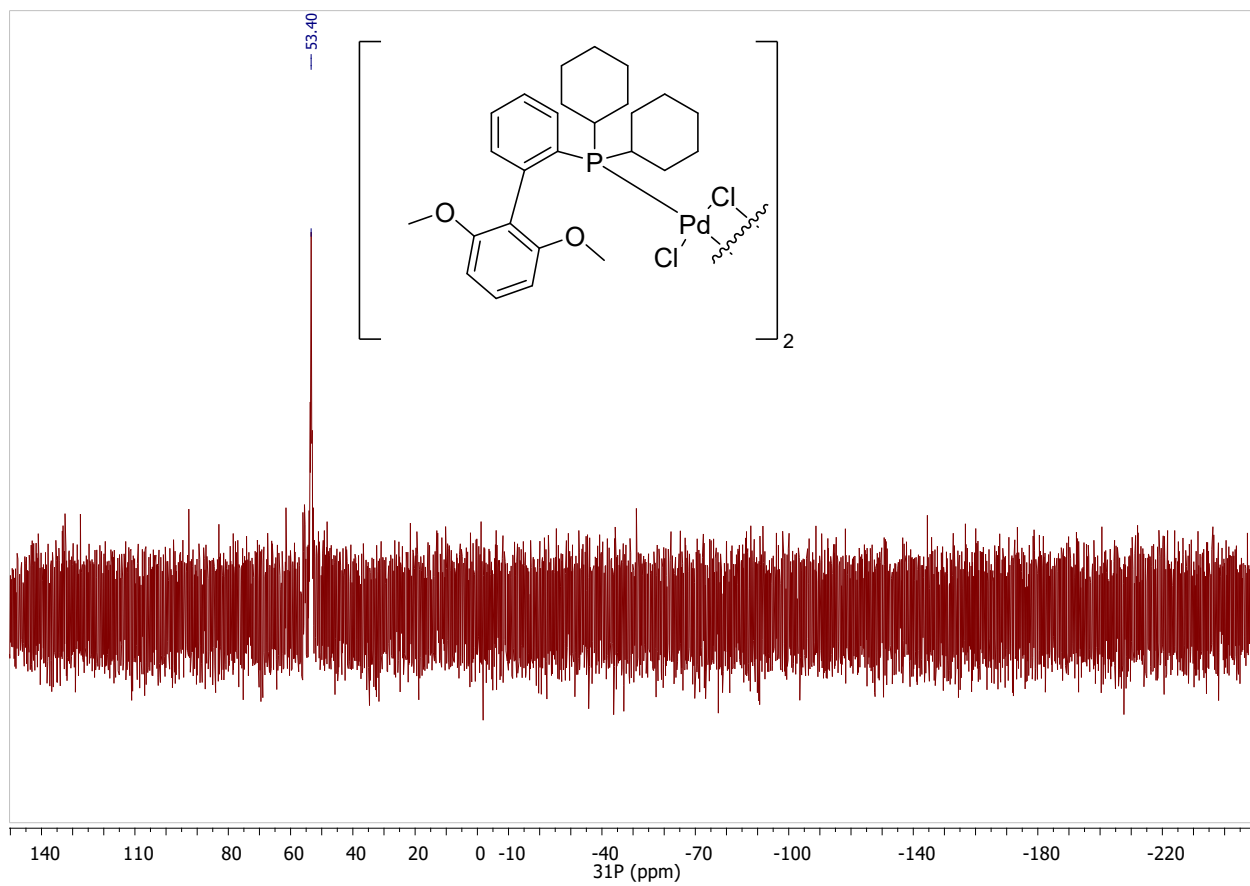

$^1\text{H}$  NMR of **5c** in  $\text{CDCl}_3$

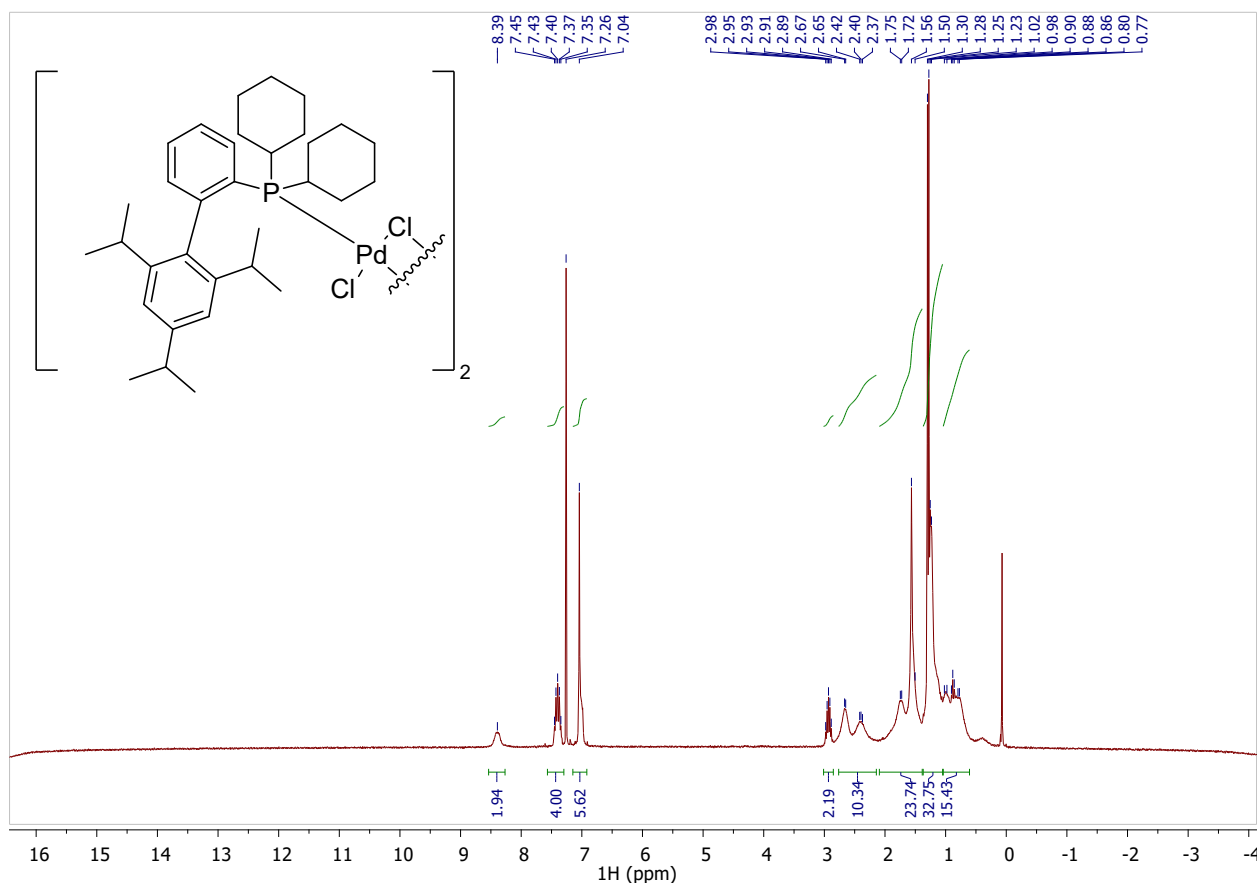

$^{31}\text{P}$  NMR of **5c** in  $\text{CDCl}_3$

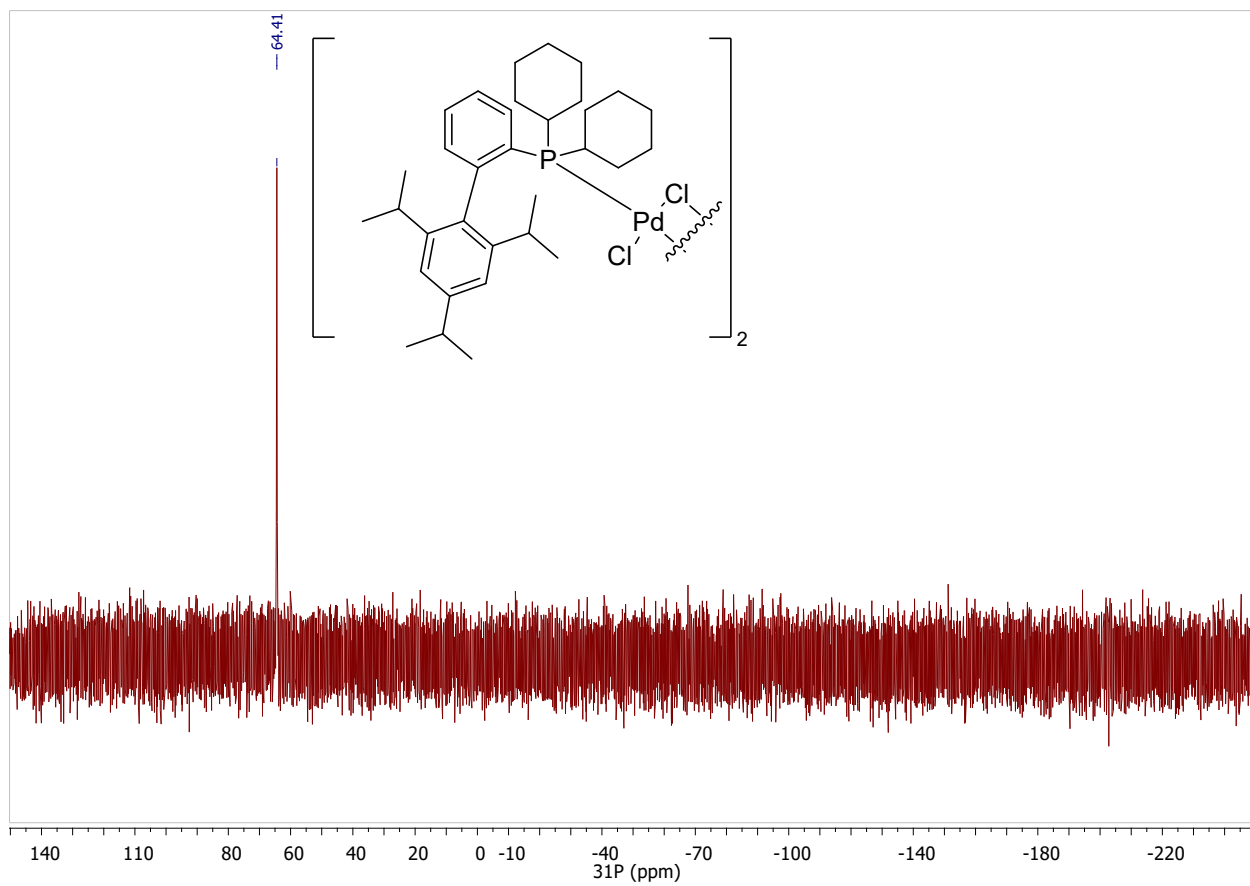

$^{13}\text{C}$  NMR of **5c** in  $\text{CDCl}_3$

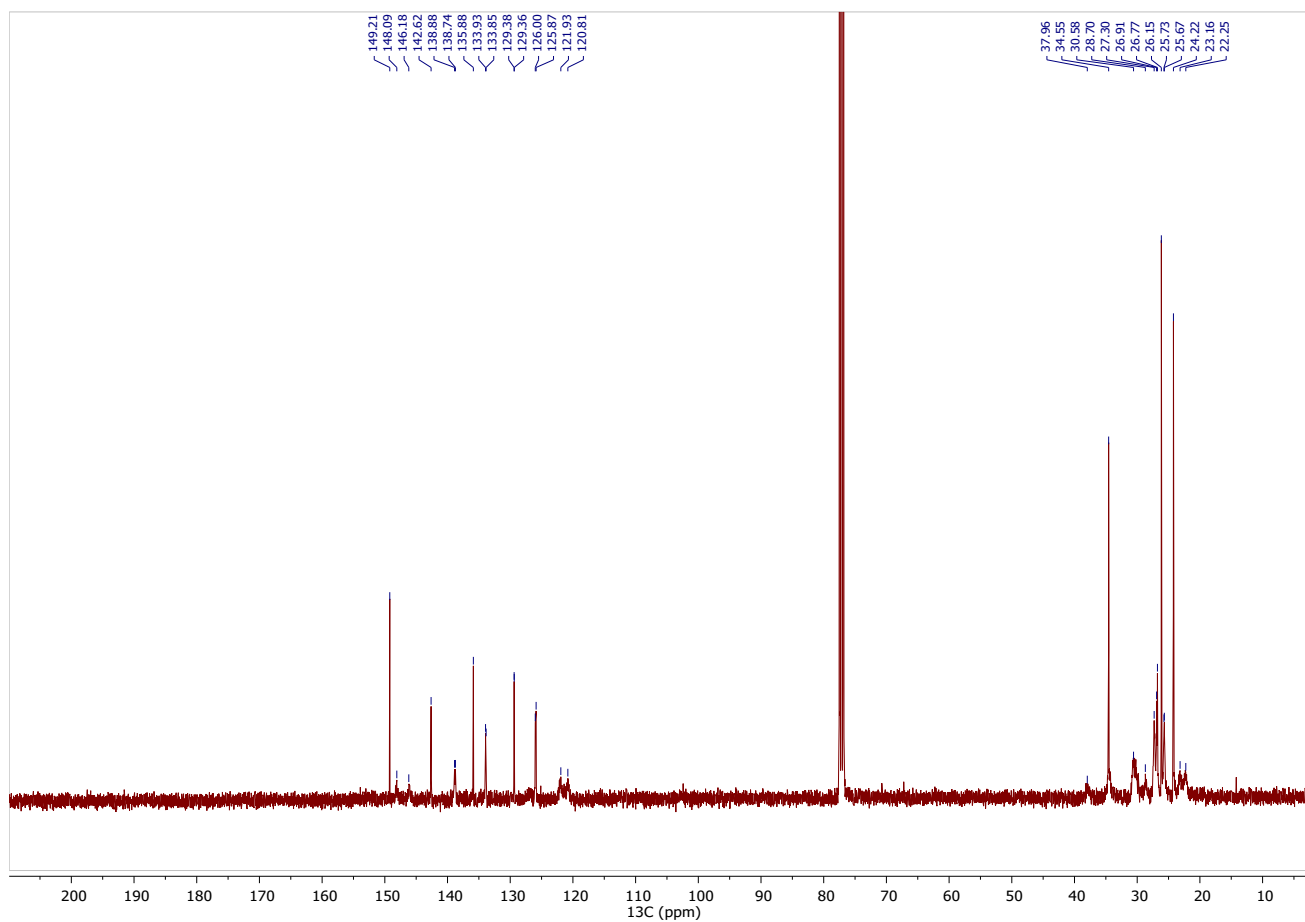

Supplement: d3dt00293d1.pdf [file d3dt00293d1.pdf]
